# Supplementary material for: Apigenin enhances apoptosis induction by 5-fluorouracil through regulation of thymidylate synthase in colorectal cancer cells
Source: PubMed Central journal article supplement — Redox Biol. 2021 Sep 21;47:102144. doi: 10.1016/j.redox.2021.102144 (PMC8476449; doi:10.1016/j.redox.2021.102144), 2021-09-21
Supplement: mmc1.pdf [file mmc1.pdf]

## Supplementary Information

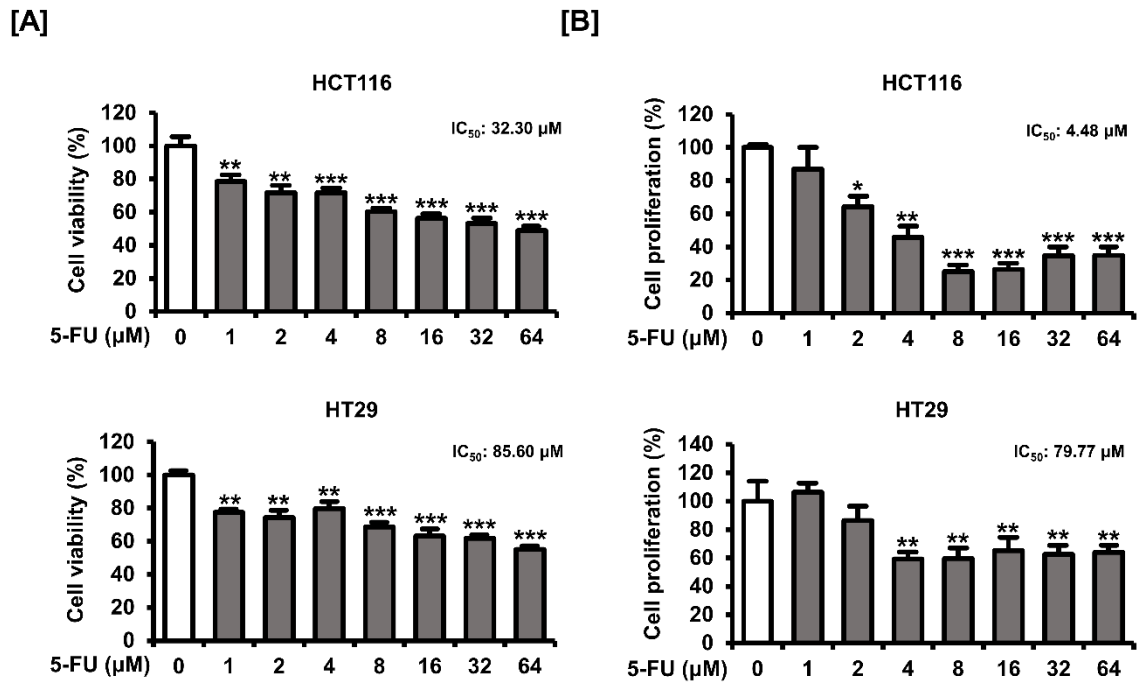

**Fig. S1.** Effects of 5-FU alone on the viability and proliferation rate of CRC cells. [A] Viability of HCT116 and HT29 cells following 5-FU treatment as analyzed by MTT assay. [B] Proliferation rates of HCT116 and HT29 cells following 5-FU treatment as analyzed by BrdU ELISA. Asterisks indicate statistically significant differences compared to untreated controls ( $***p < 0.001$ ;  $**p < 0.01$ ;  $*p < 0.05$ ).

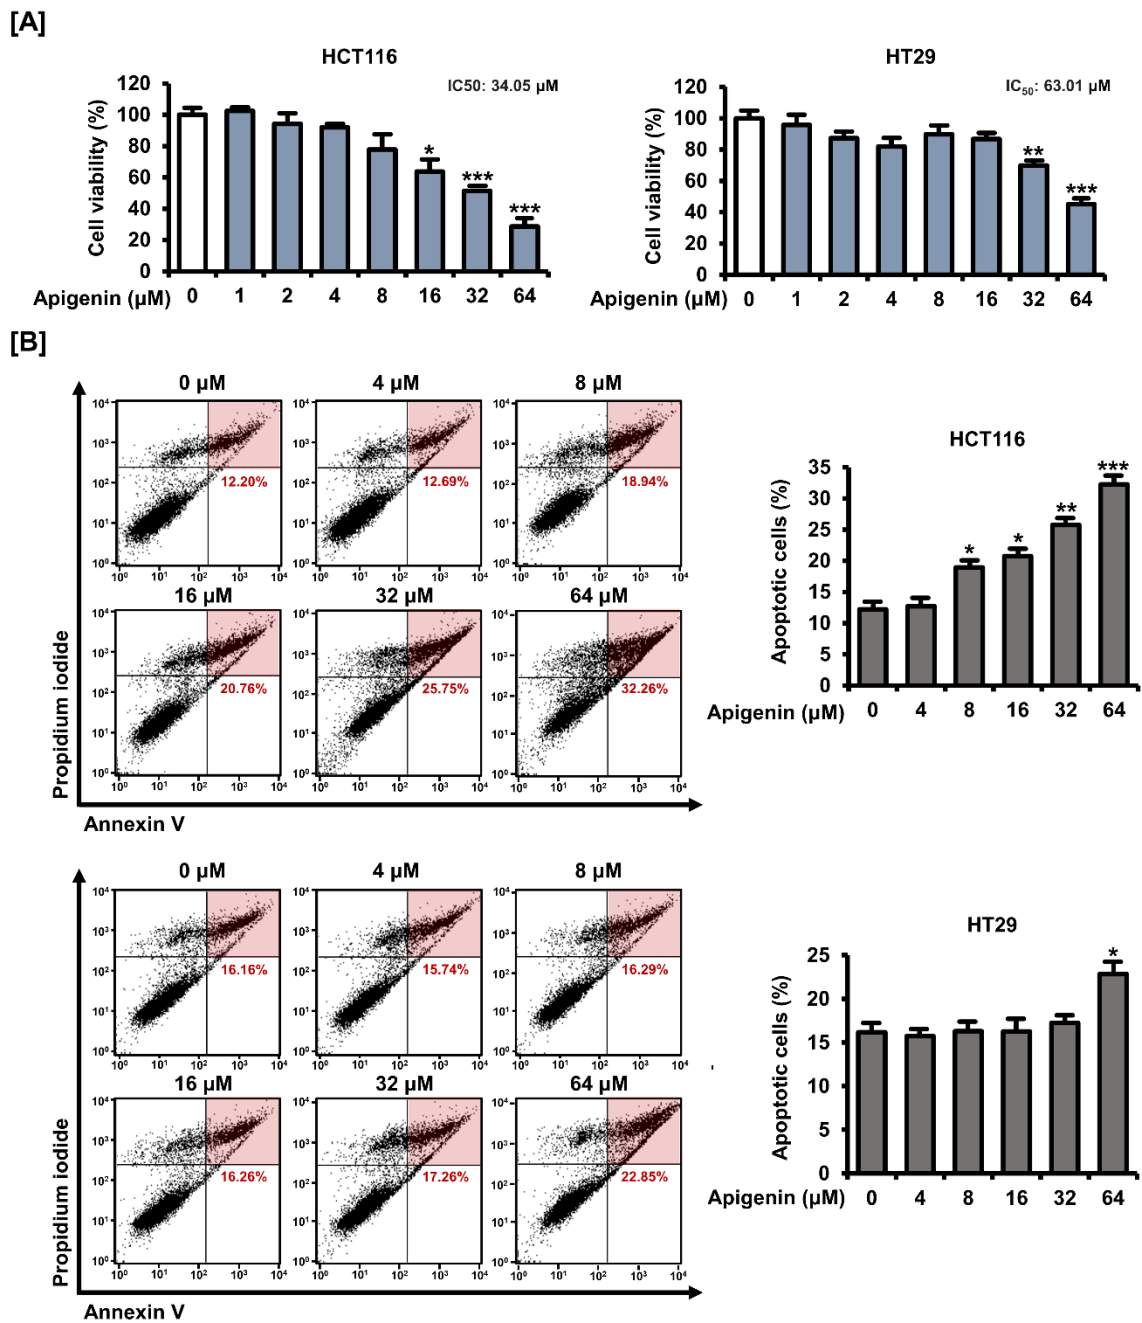

**Fig. S2.** Effects of apigenin alone on the viability and apoptosis of CRC cells. [A] Viability of HCT116 and HT29 cells following apigenin treatment as analyzed by MTT assay. [B] Death rates of HCT116 and HT29 cells following apigenin treatment as measured by dual Annexin V/PI staining and flow cytometry. The upper right quadrant shows cells in late apoptosis. Asterisks indicate statistically significant differences compared to untreated controls ( $***p < 0.001$ ;  $**p < 0.01$ ;  $*p < 0.05$ ).

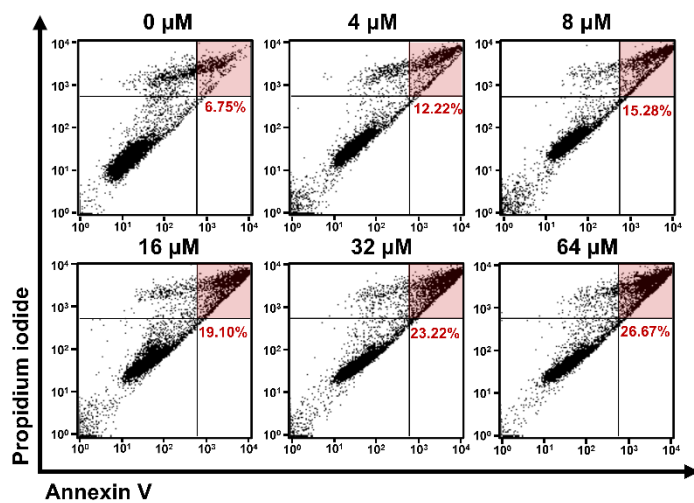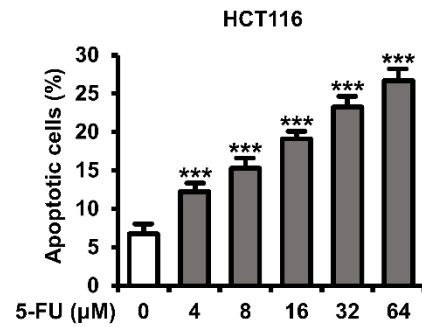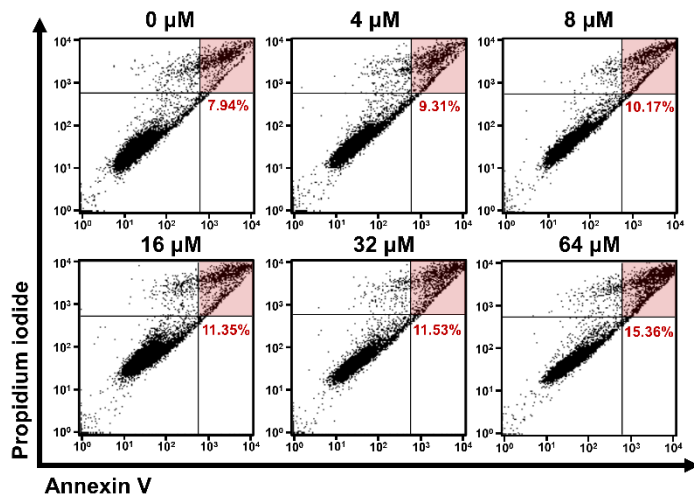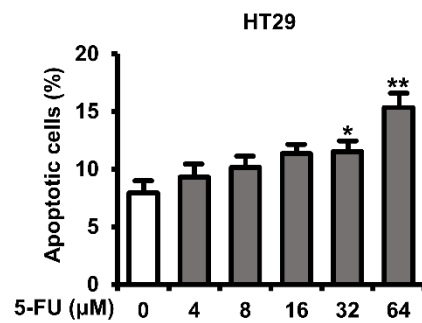

**Fig. S3.** Effects of 5-FU on CRC cell apoptosis. Death rates of HCT116 and HT29 cells following 5-FU treatment were measured by dual Annexin V/PI staining and flow cytometry. The upper right quadrant shows late apoptosis cells. Asterisks indicate statistically significant differences compared to untreated controls ( $***p < 0.001$ ;  $**p < 0.01$ ;  $*p < 0.05$ ).
