# Supplementary material for: Apigenin enhances apoptosis induction by 5-fluorouracil through regulation of thymidylate synthase in colorectal cancer cells
Source: PubMed Central journal article supplement — Redox Biol. 2021 Sep 21;47:102144. doi: 10.1016/j.redox.2021.102144 (PMC8476449; doi:10.1016/j.redox.2021.102144), 2021-09-21
Supplement: mmc2.pdf [file mmc2.pdf]

Original blots for Figure 1

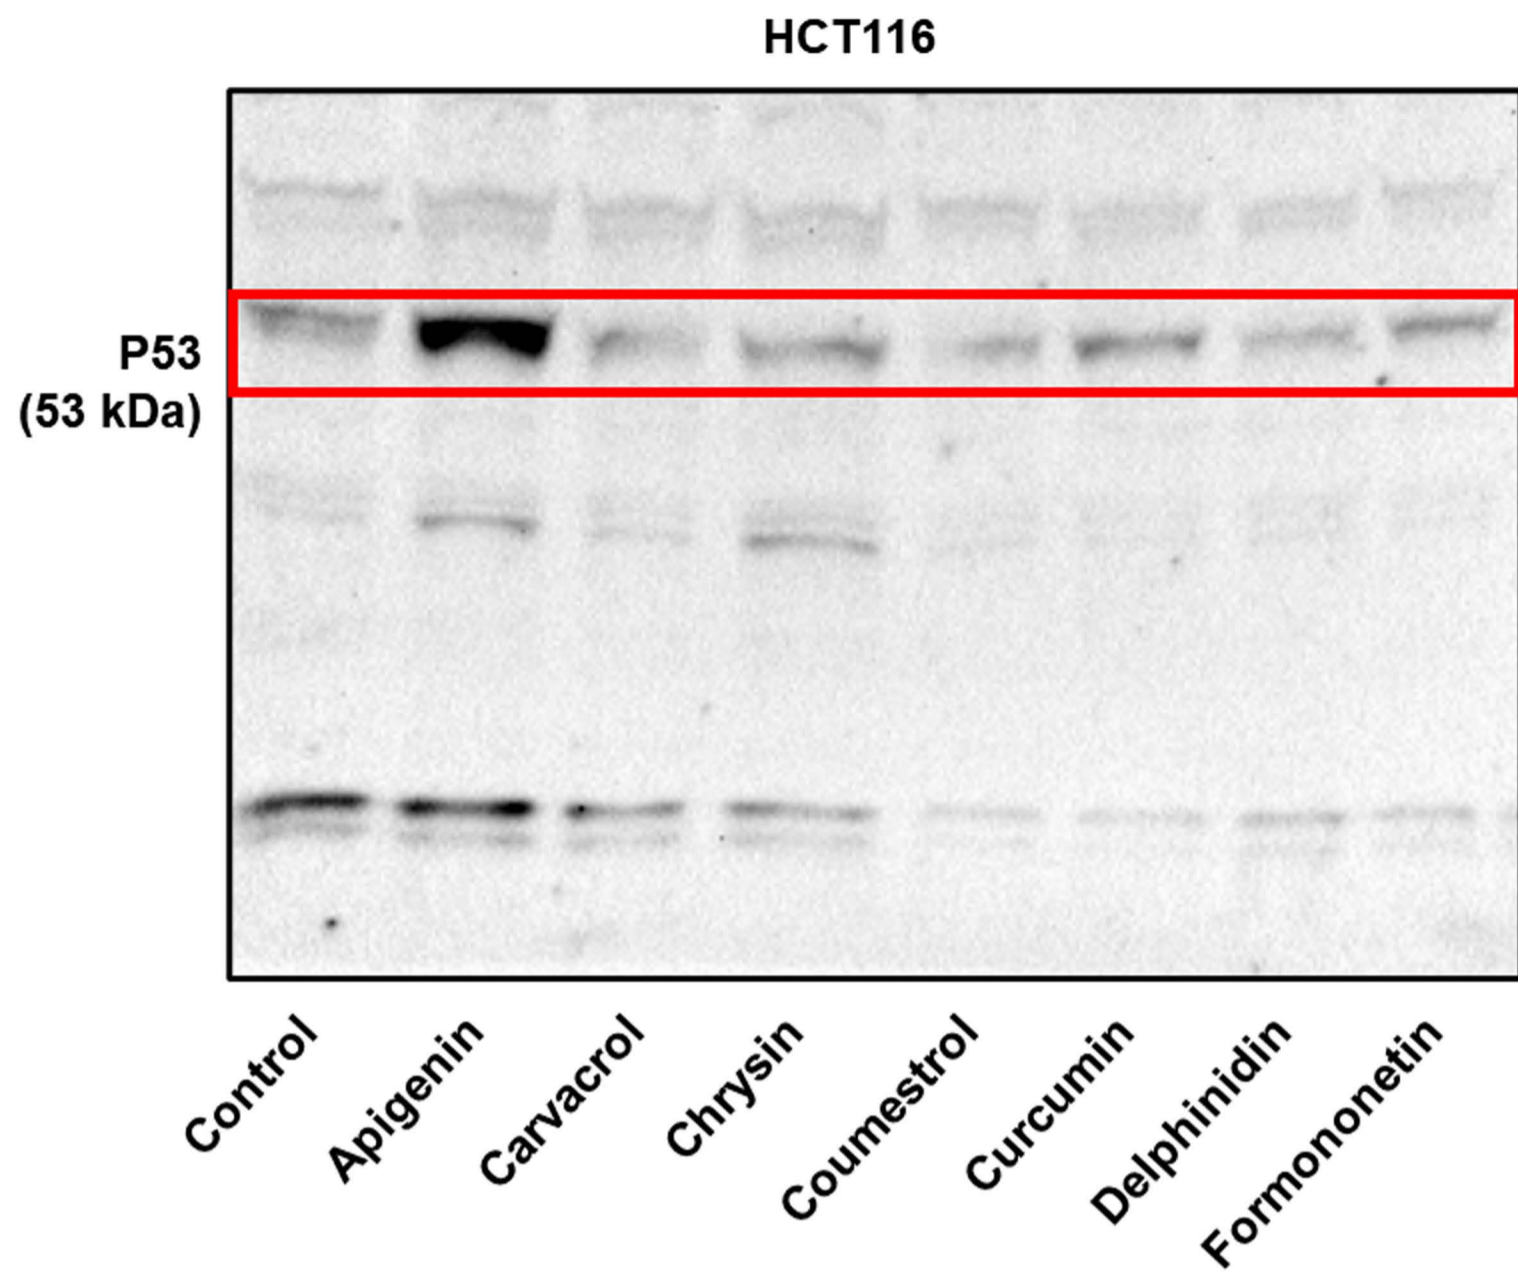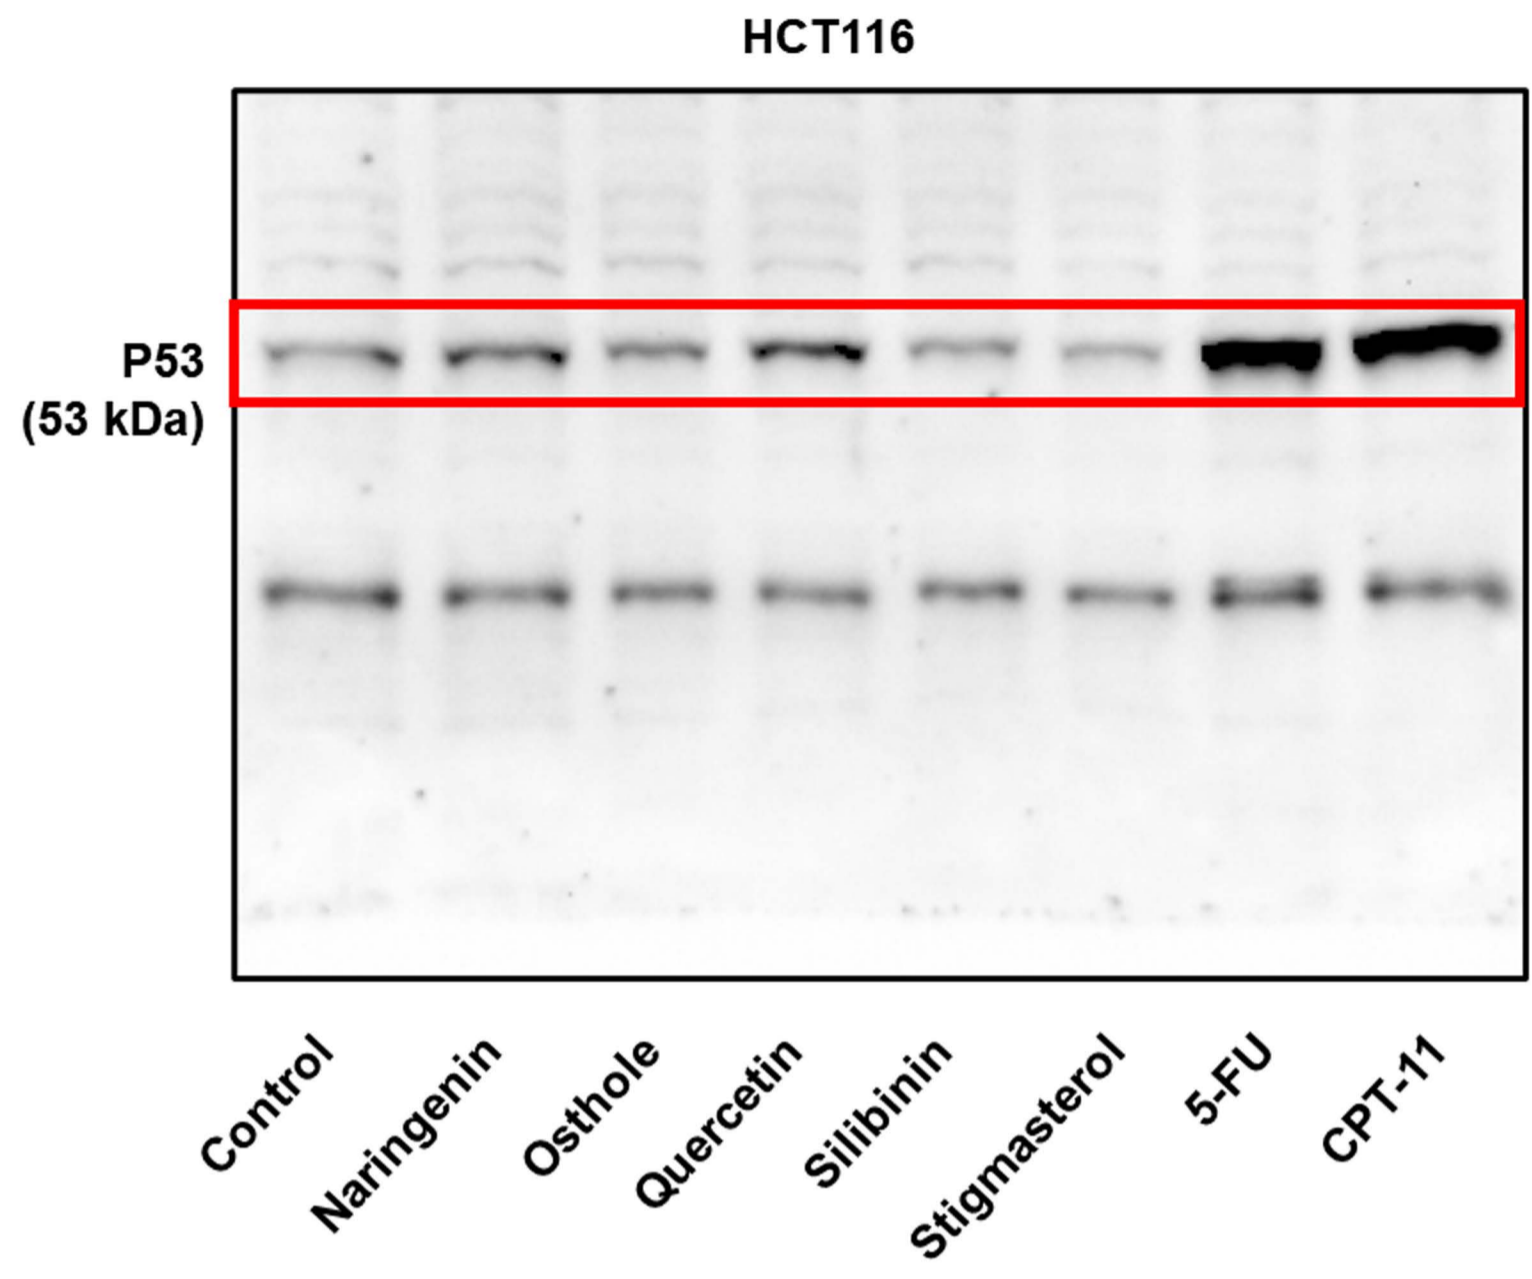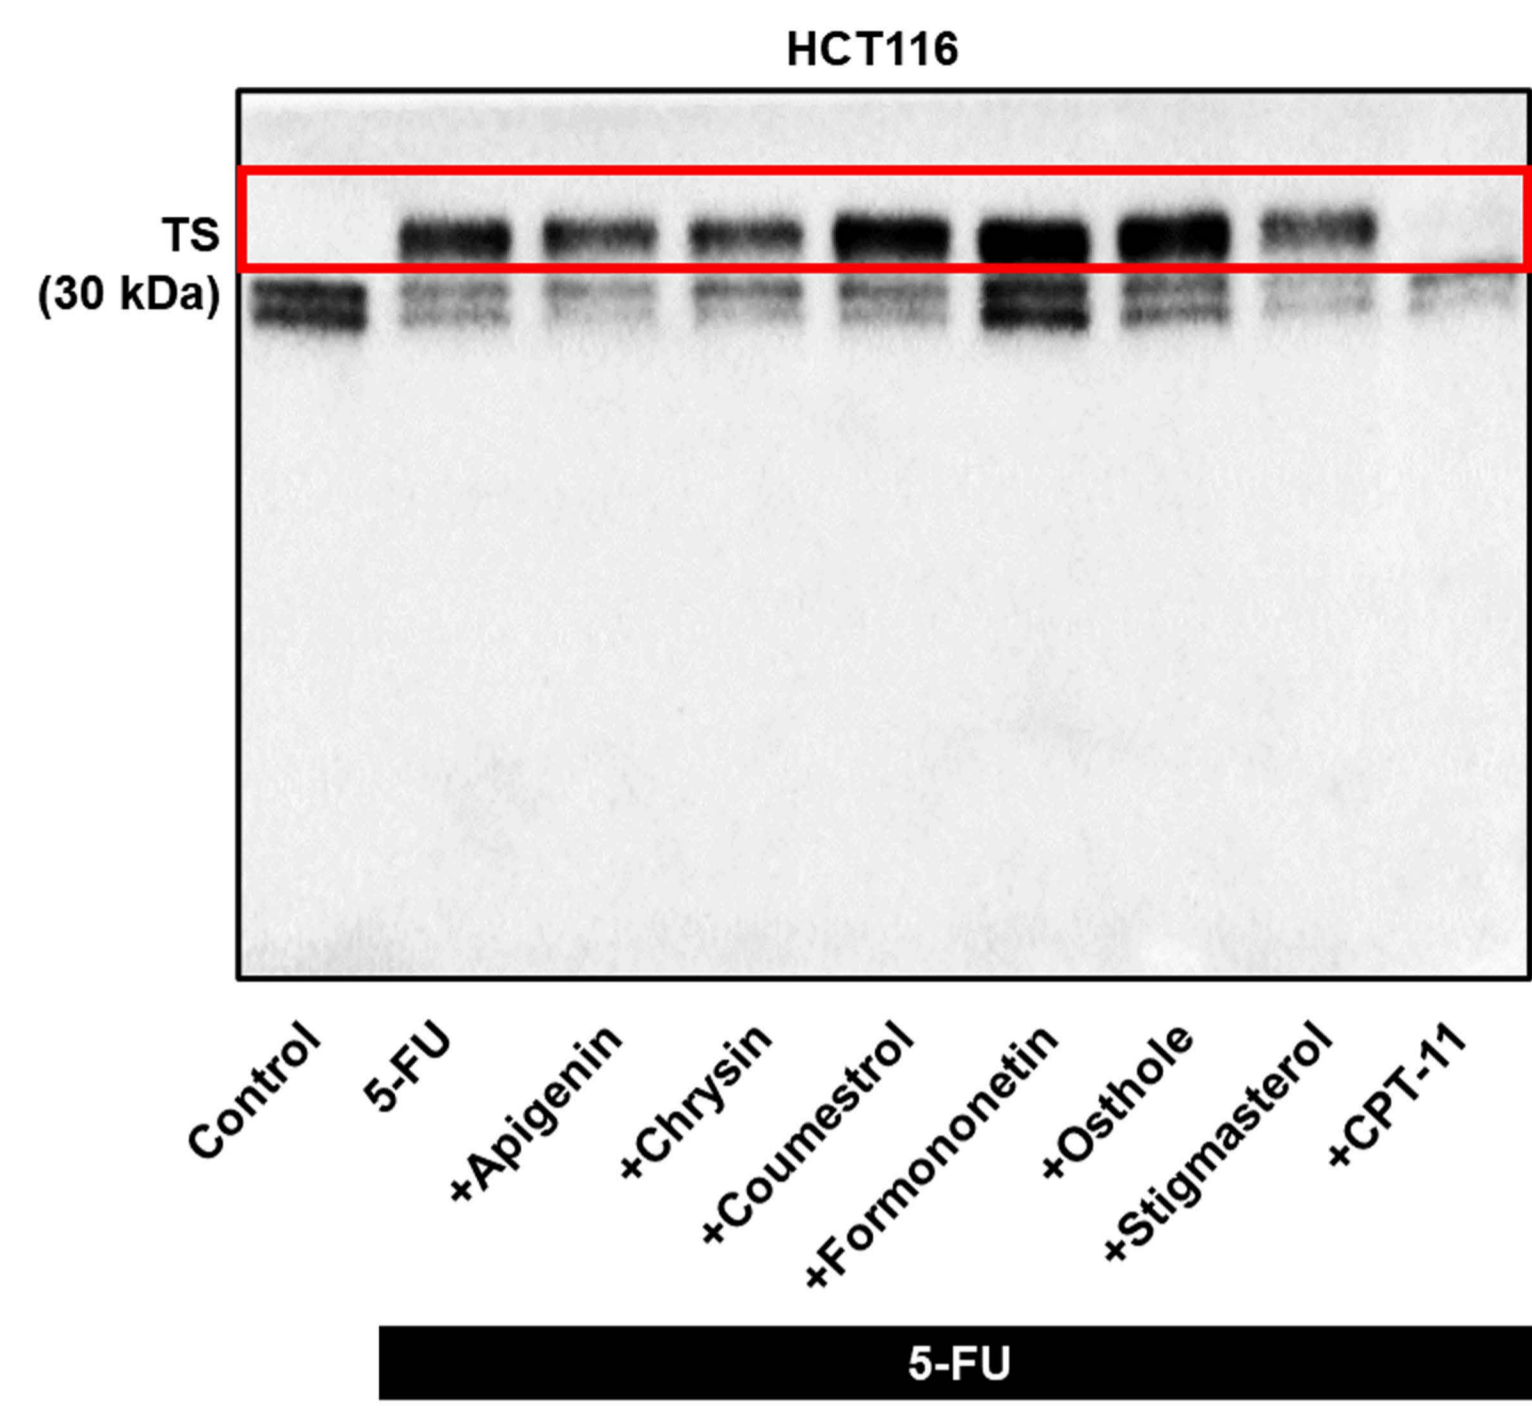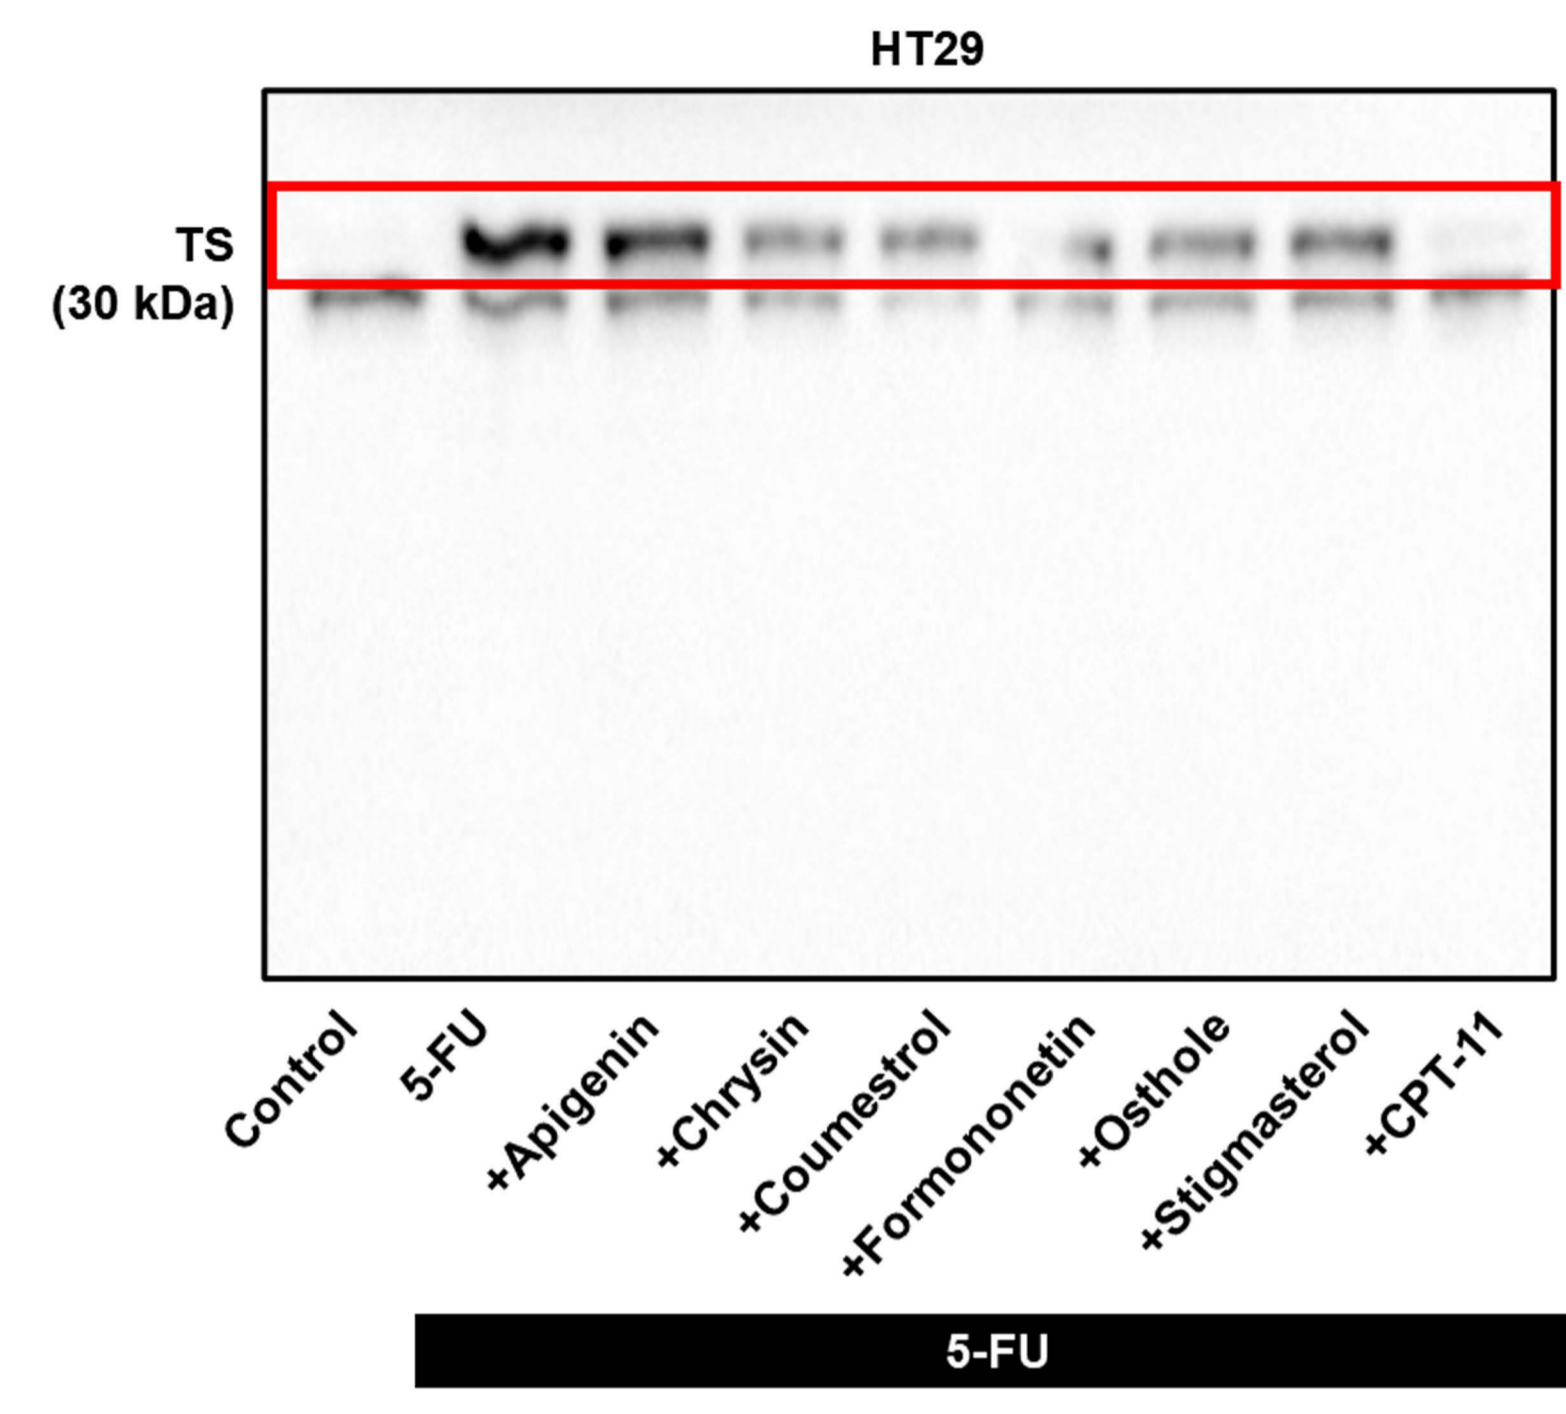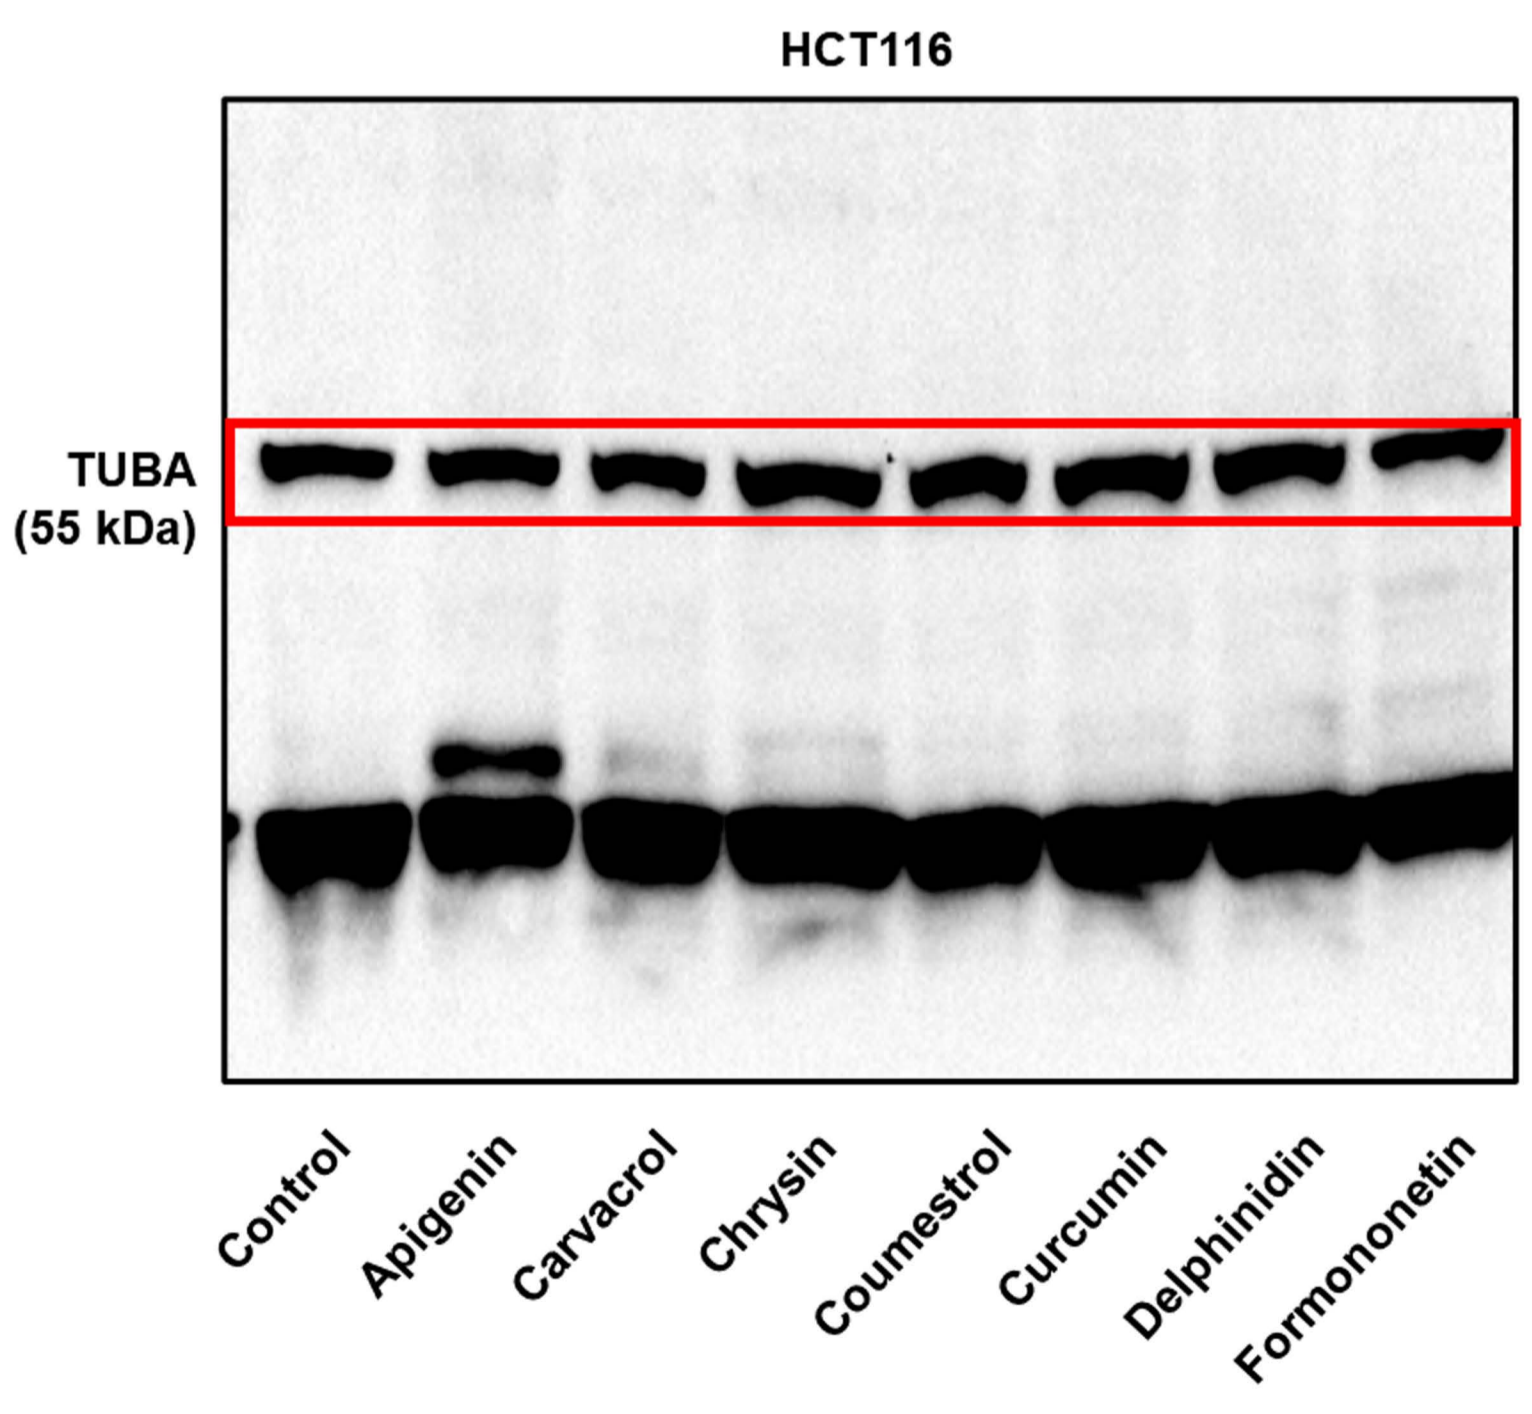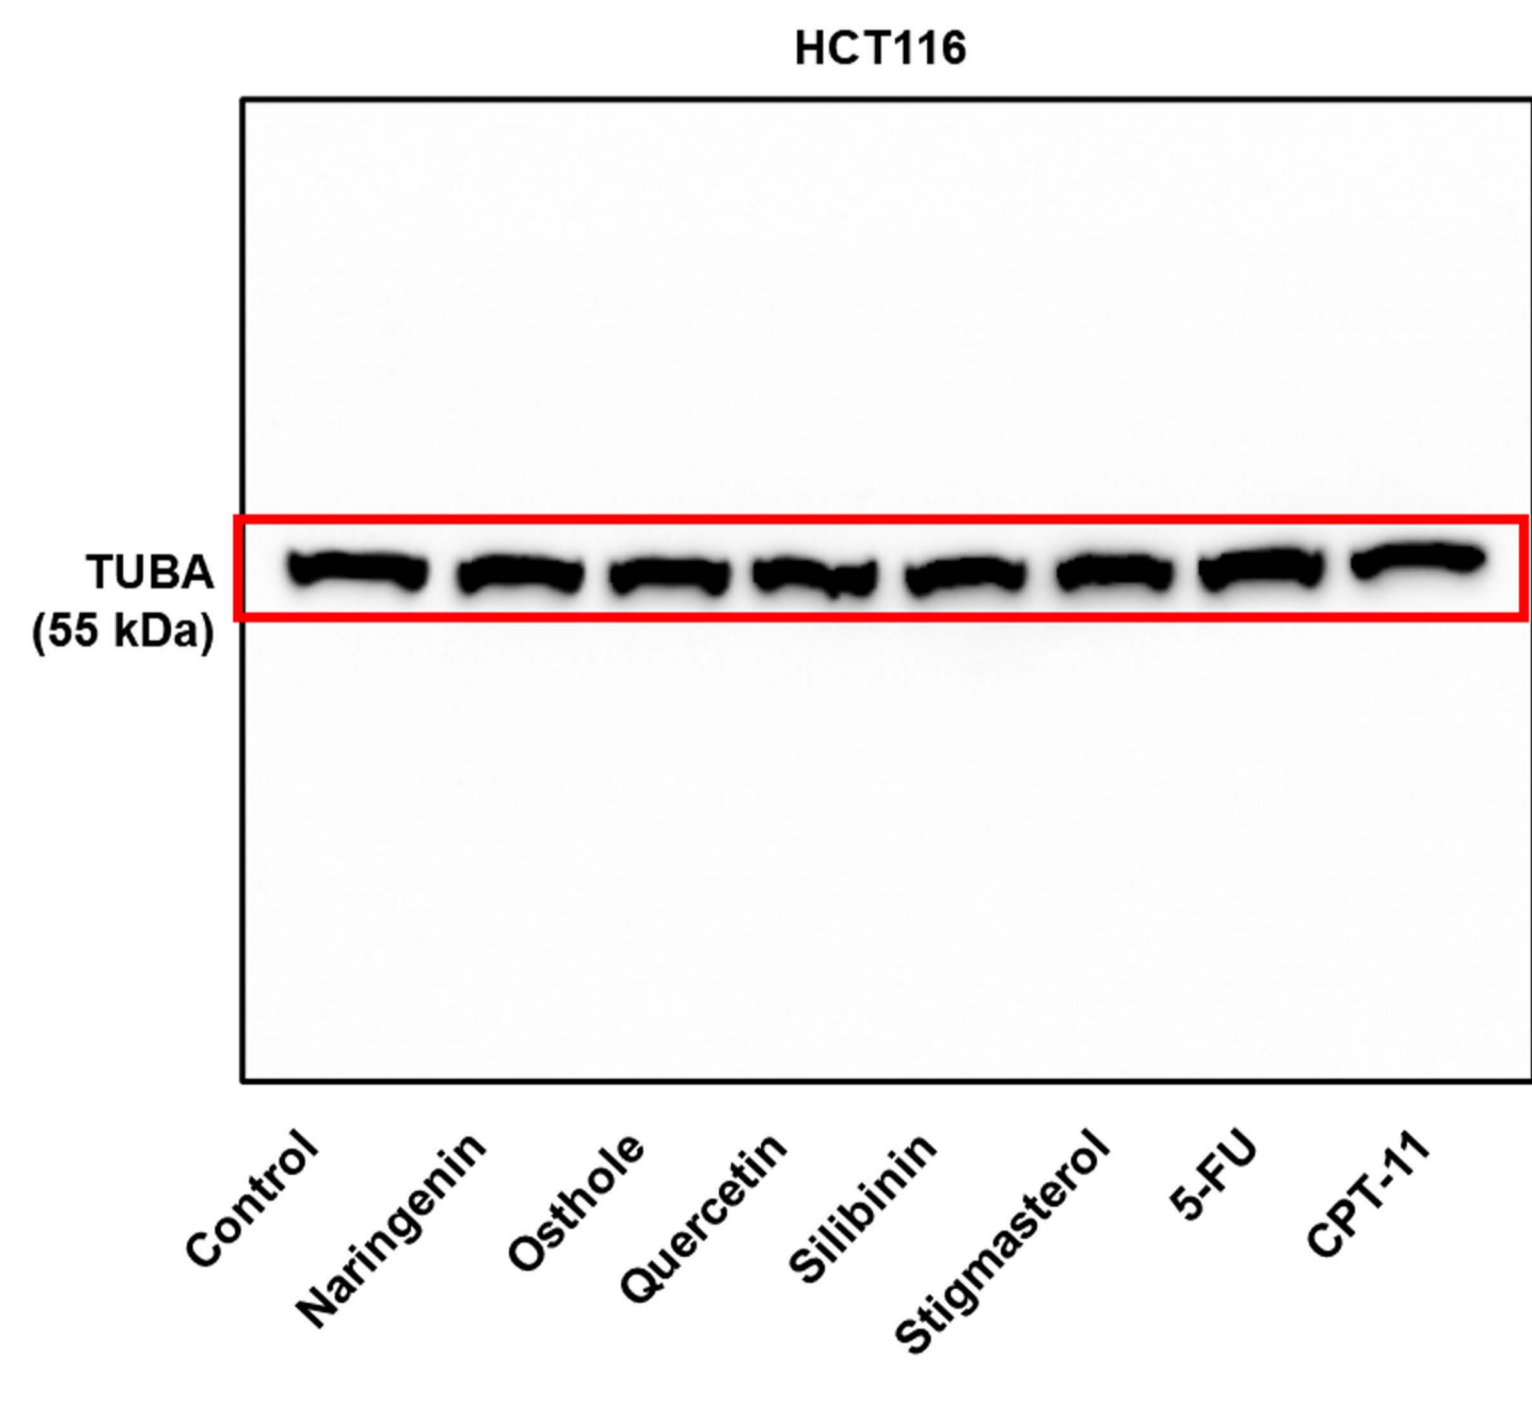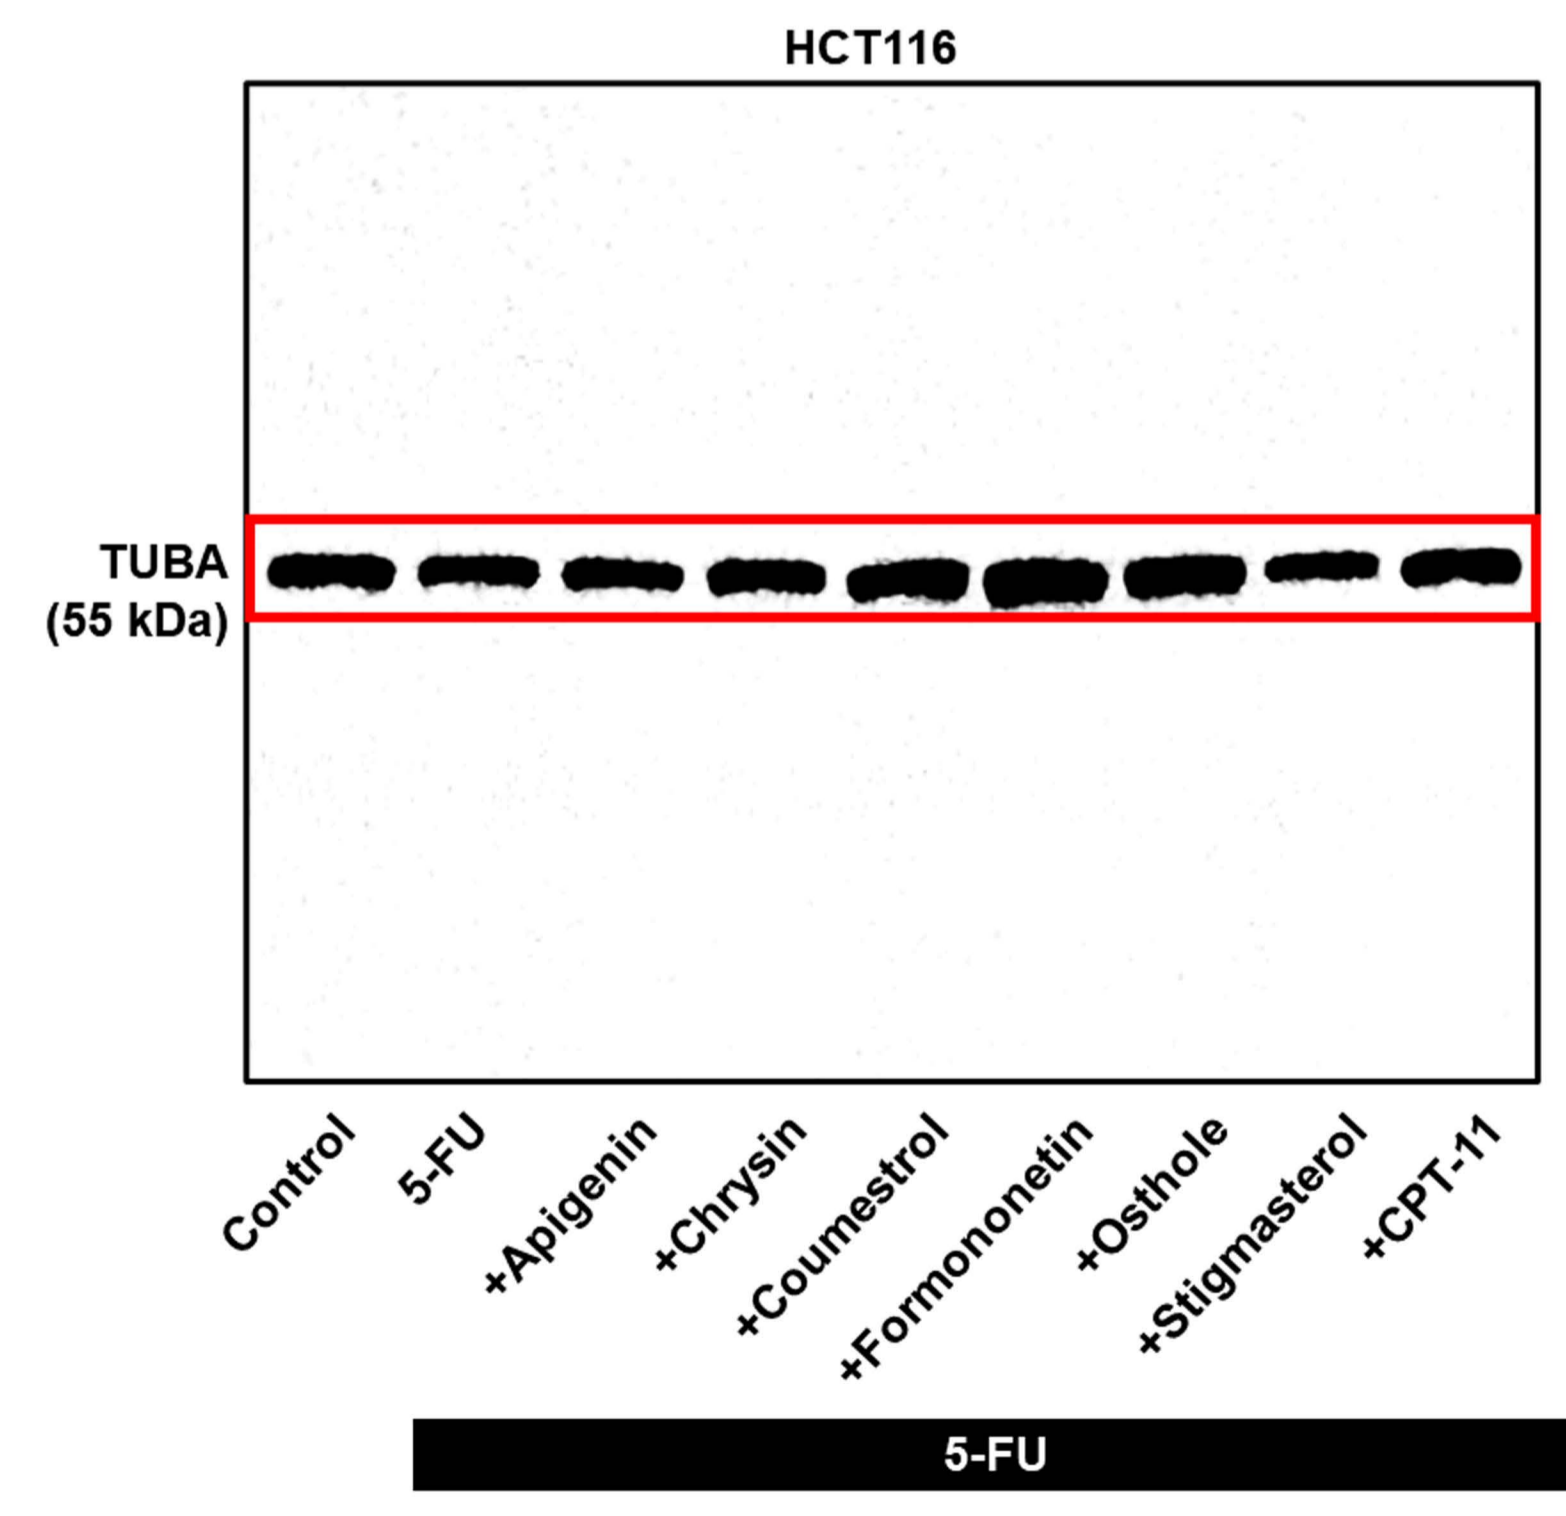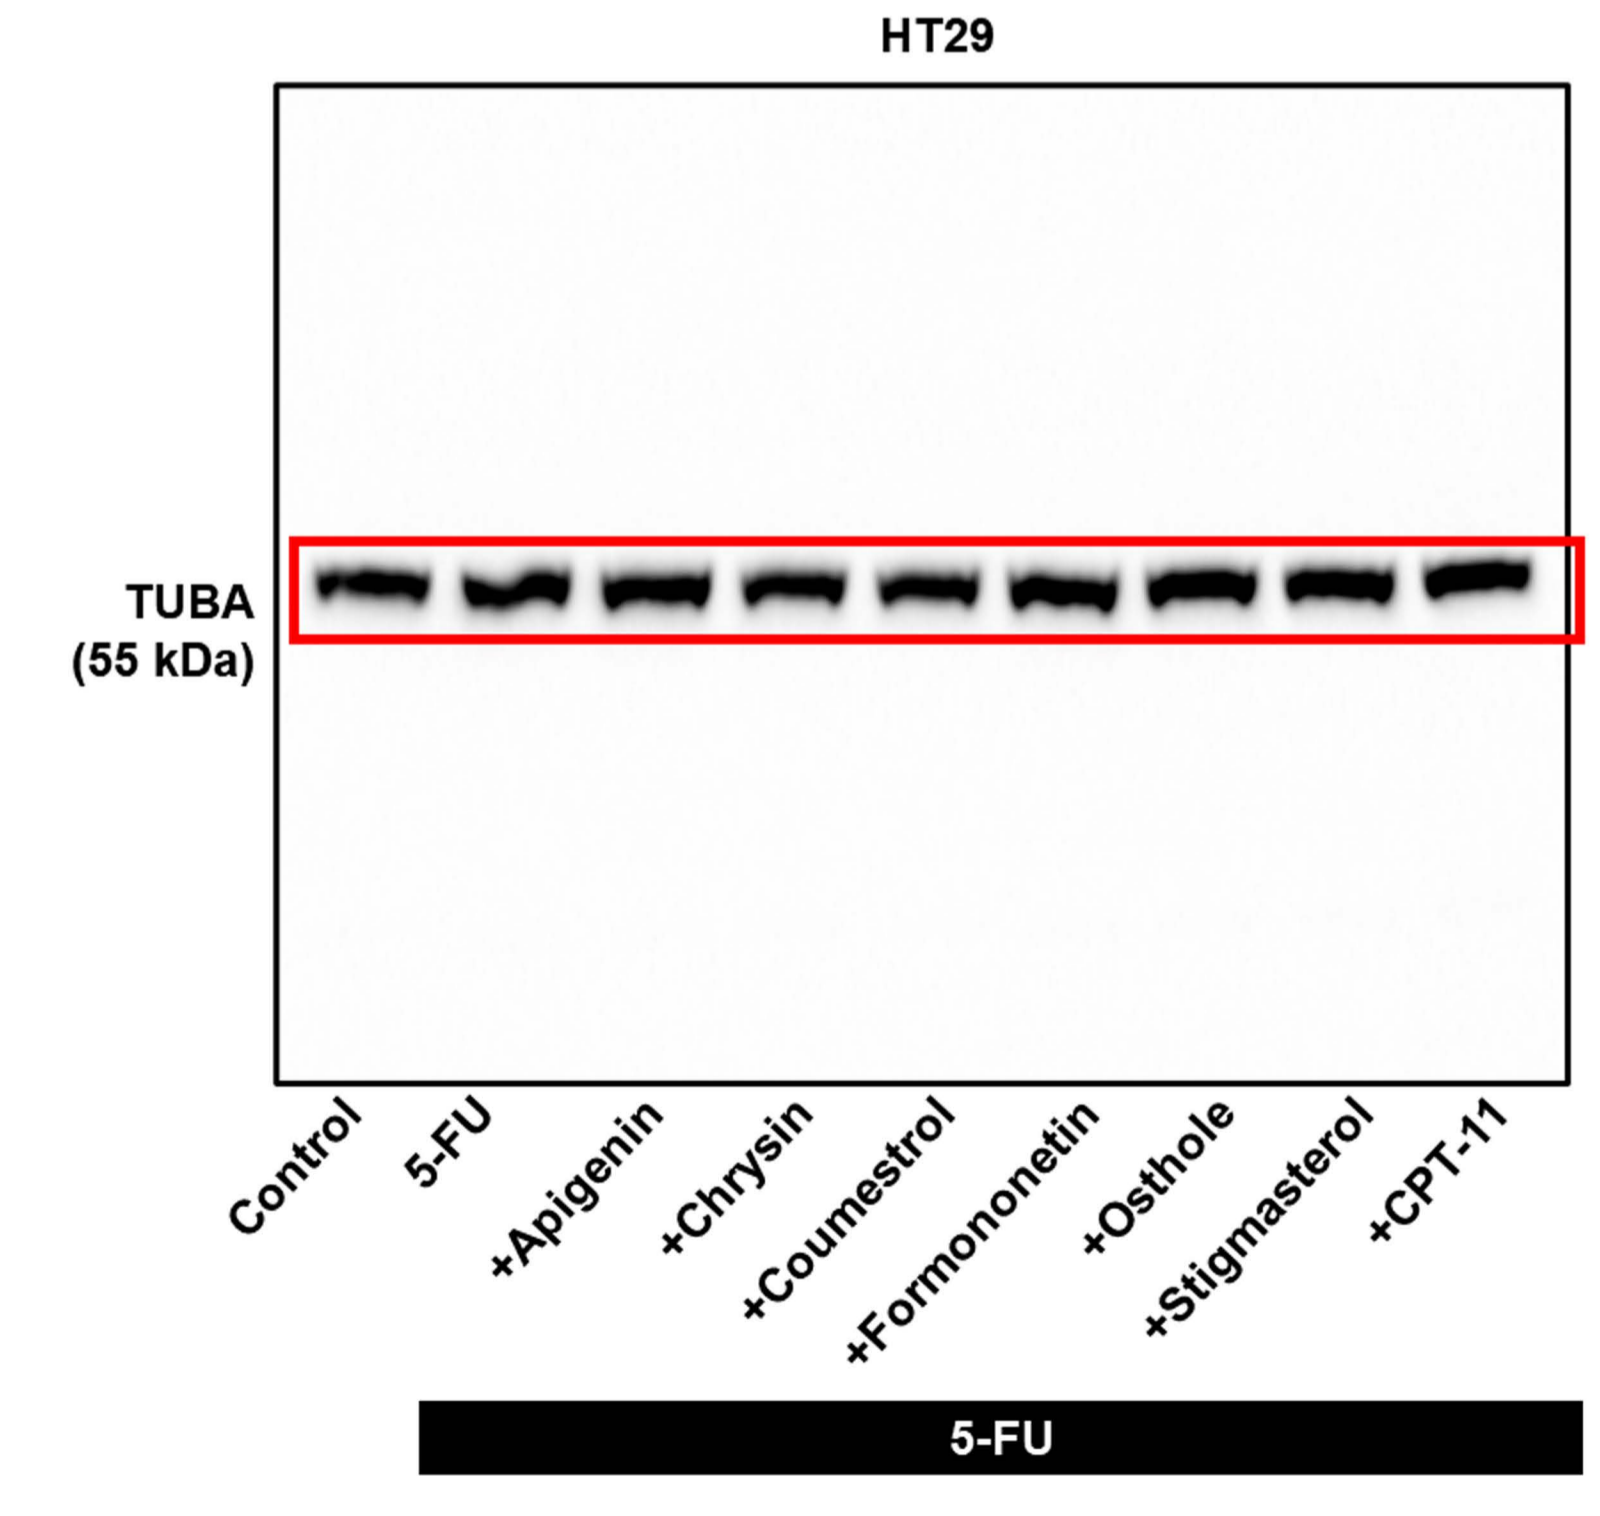

Original blots for Figure 2

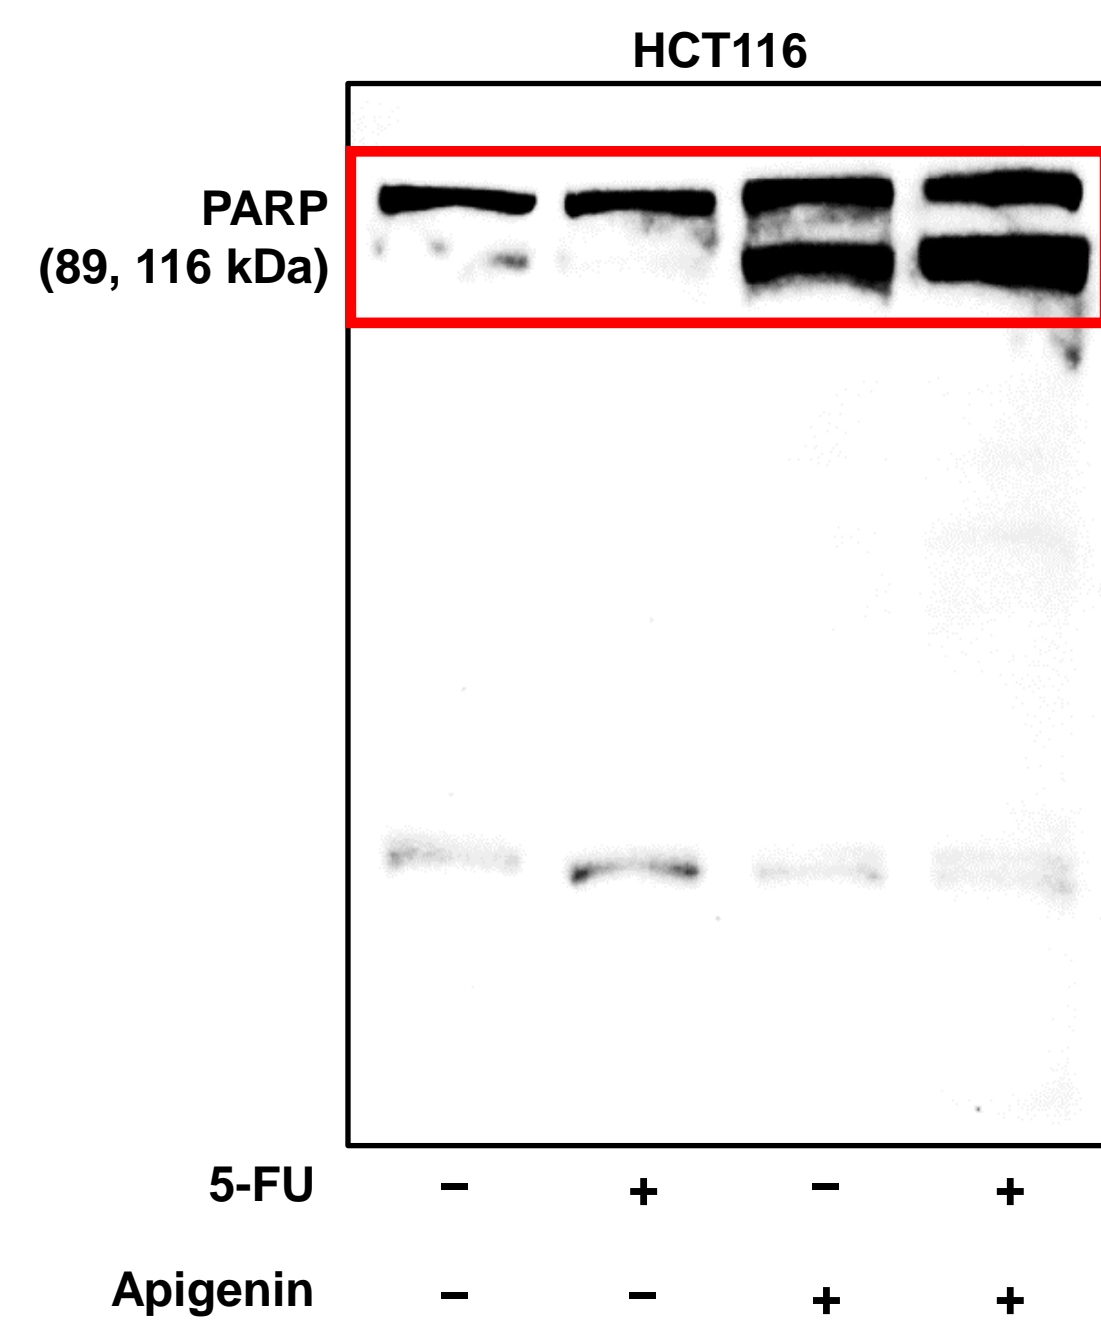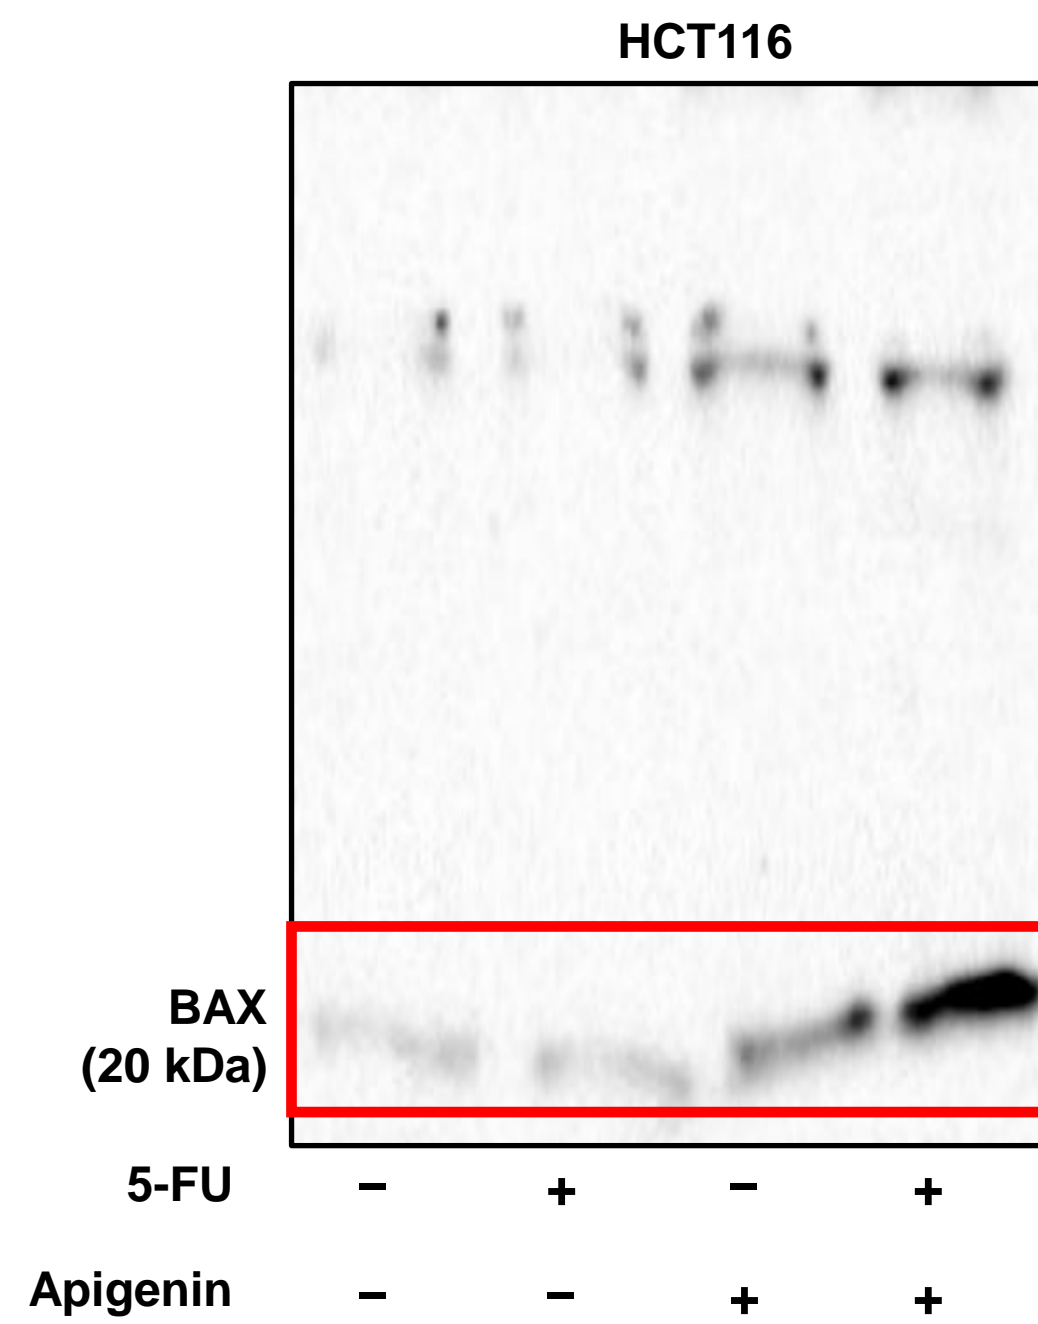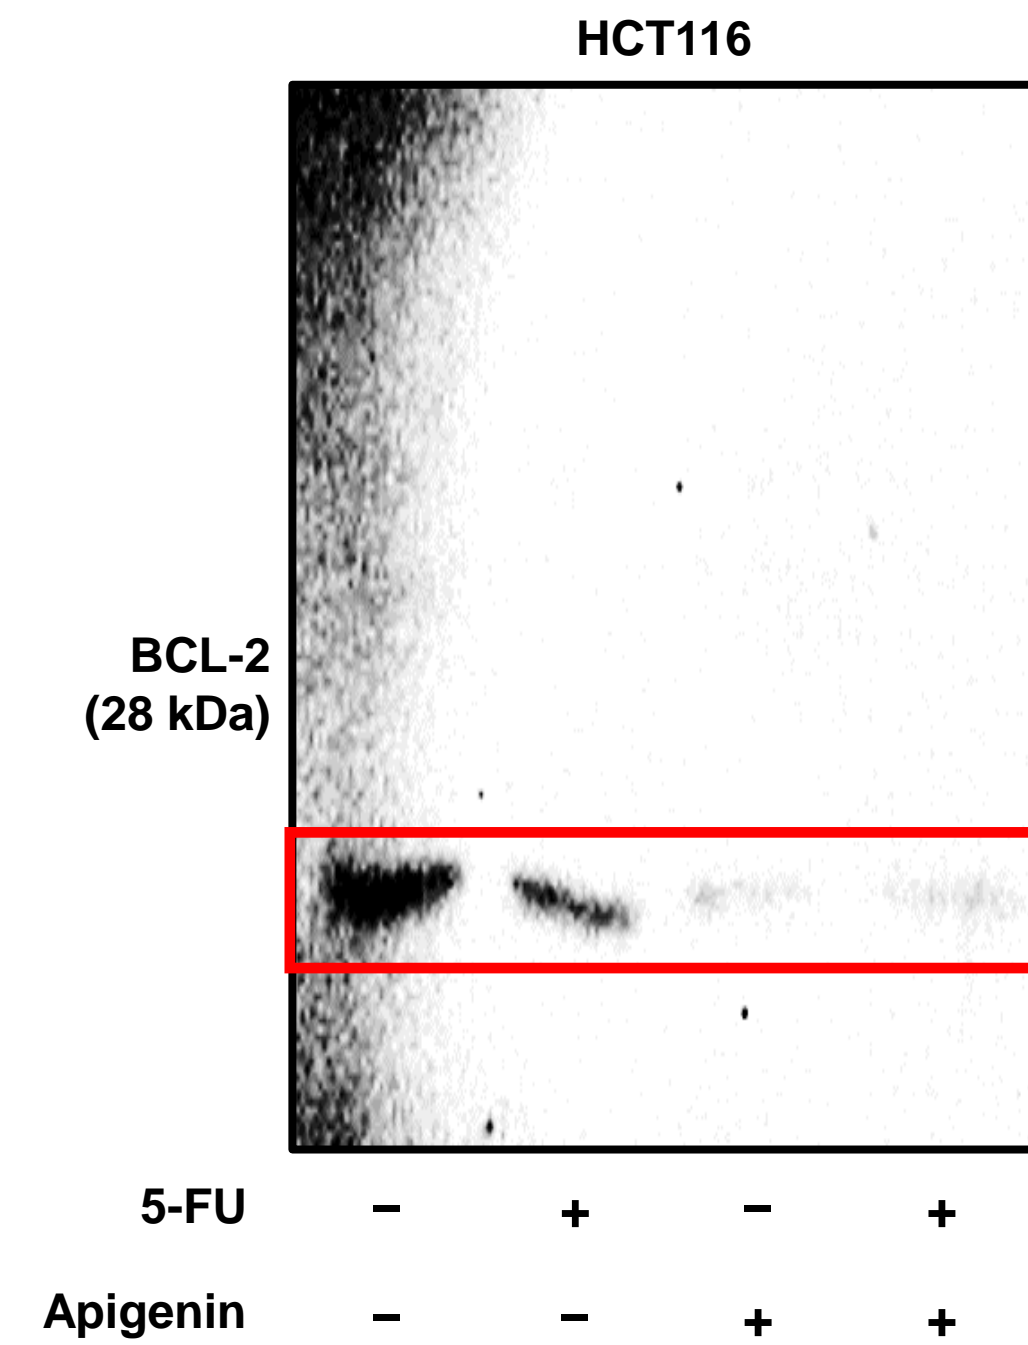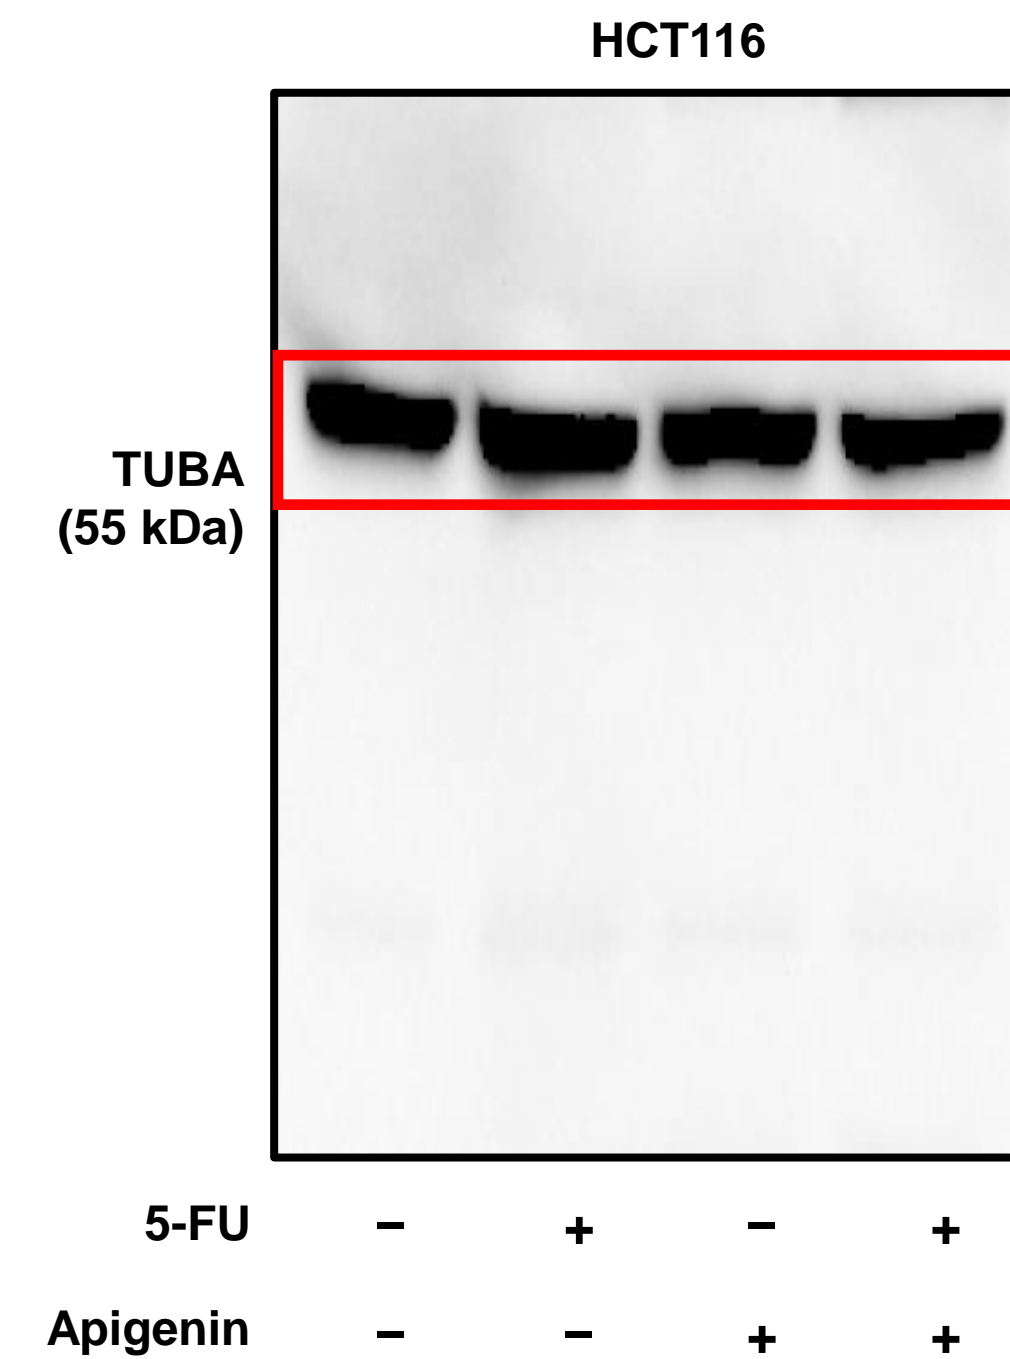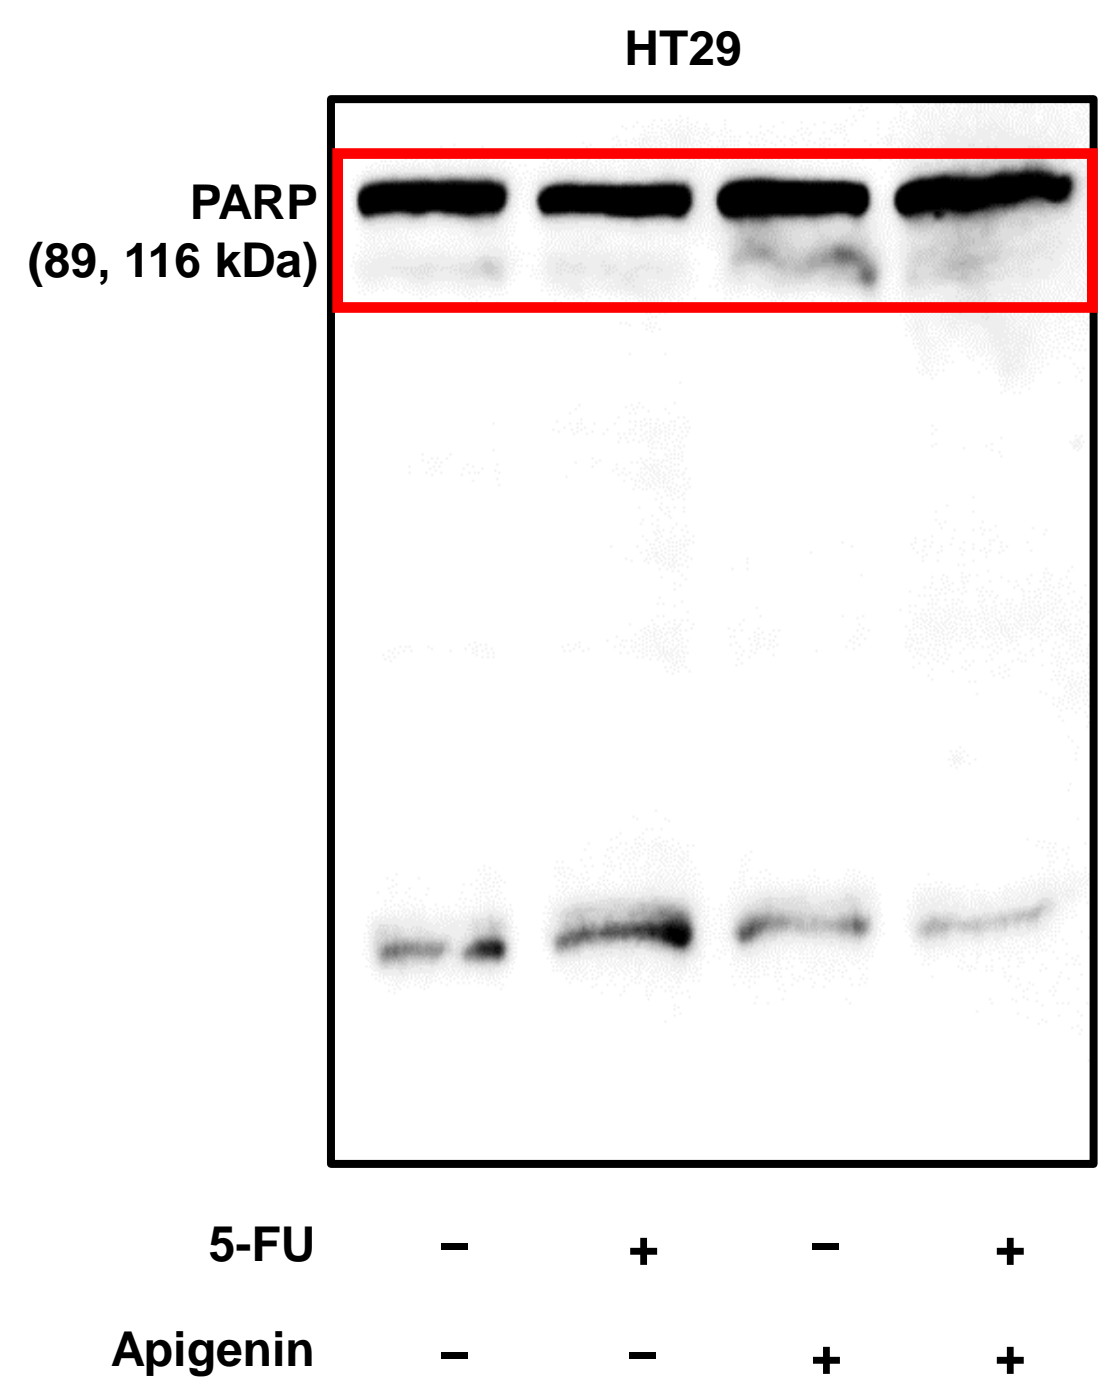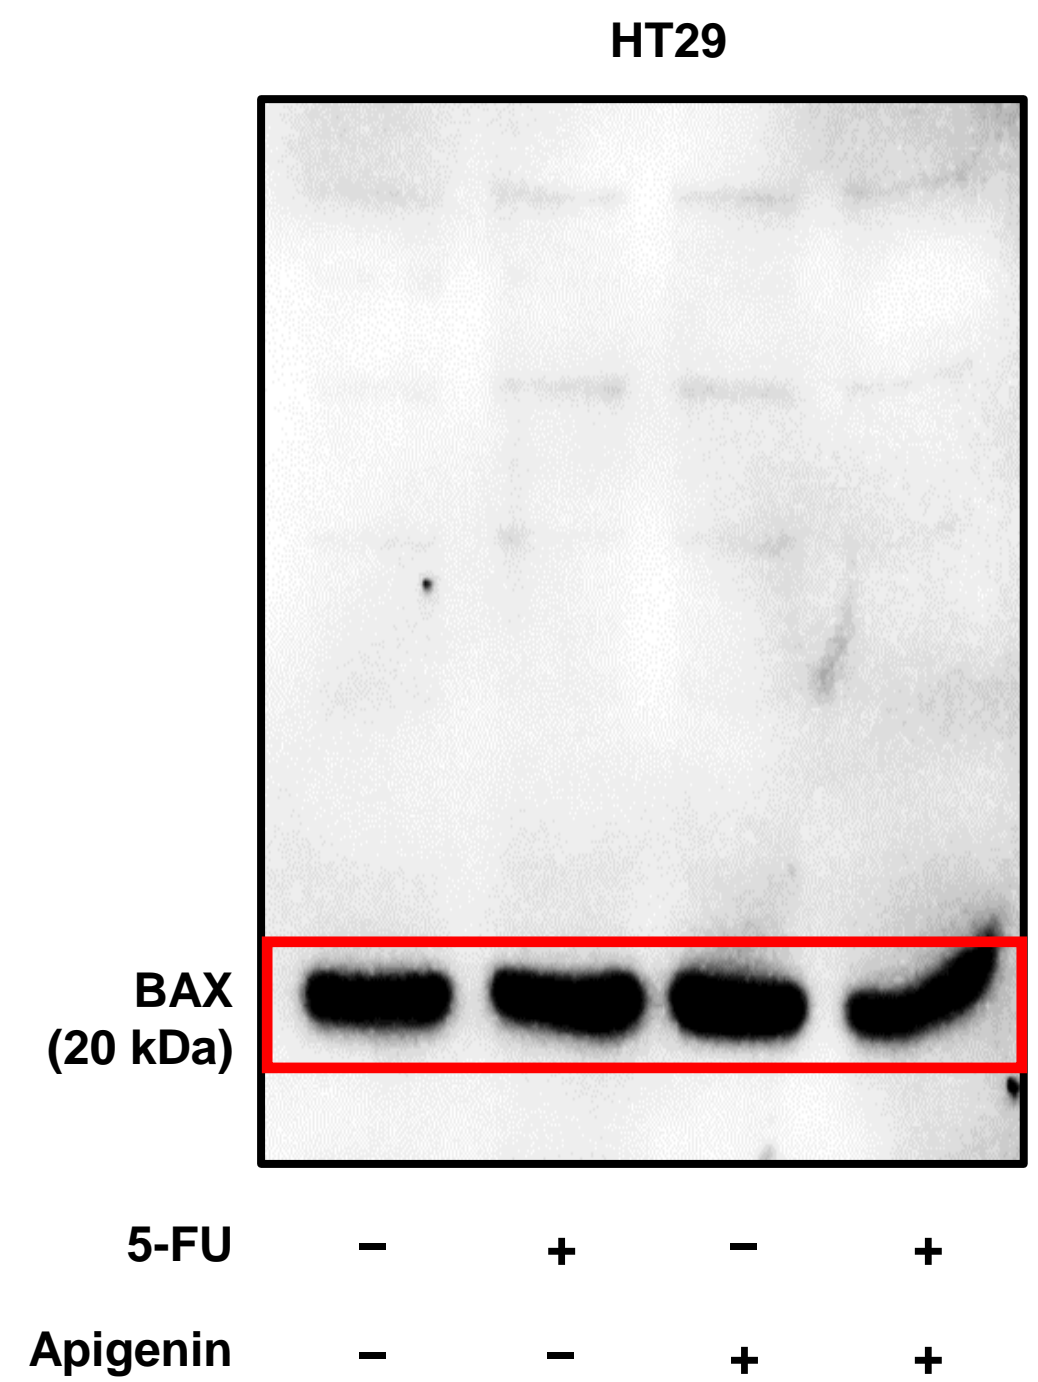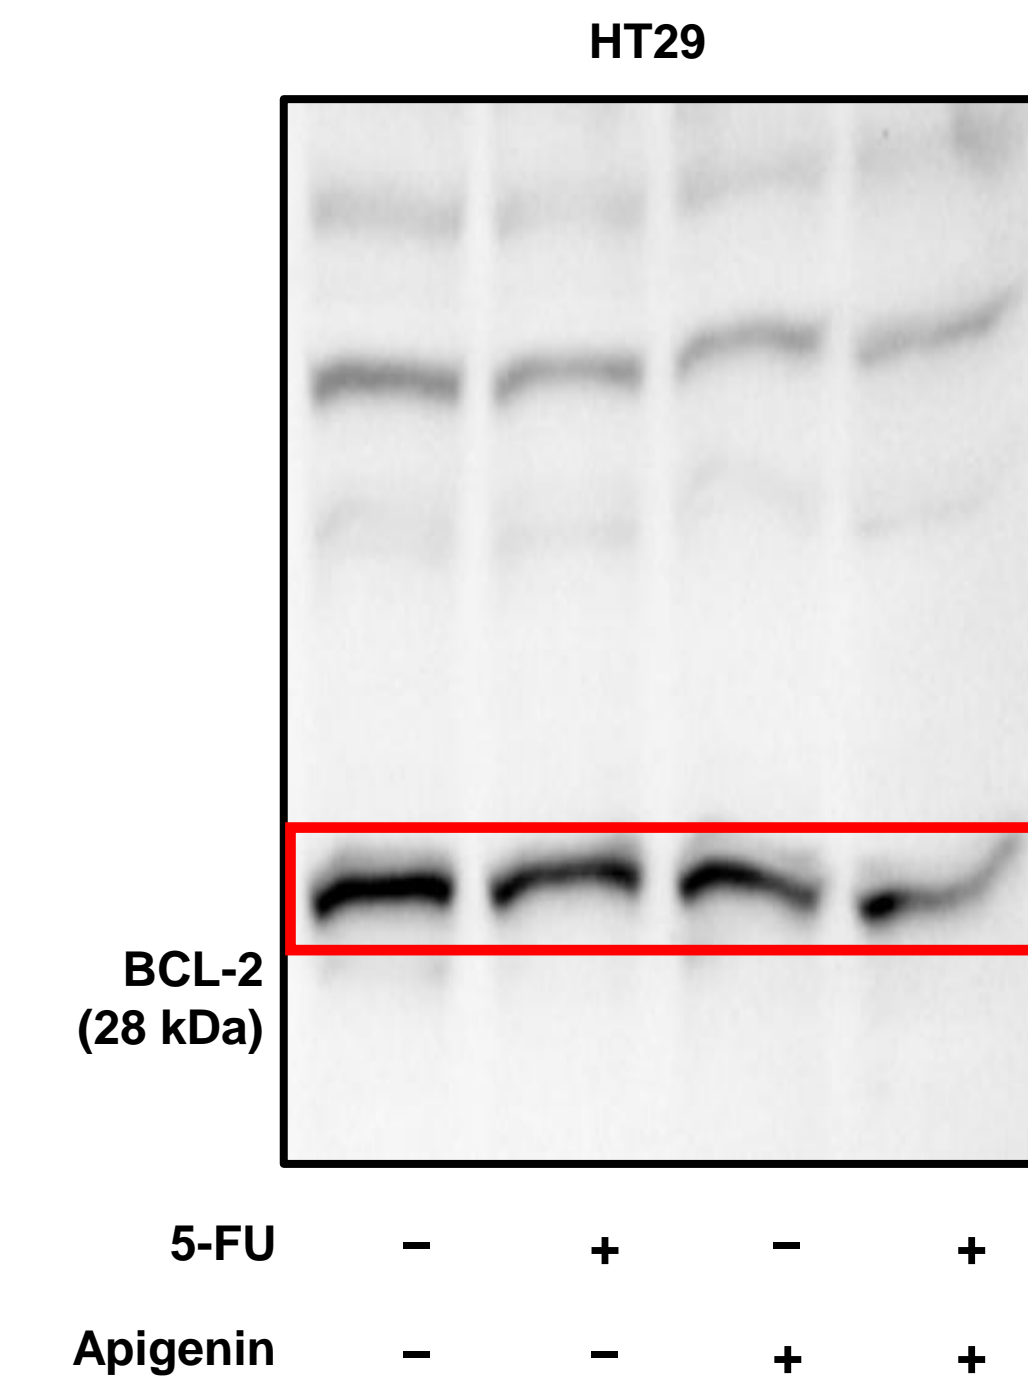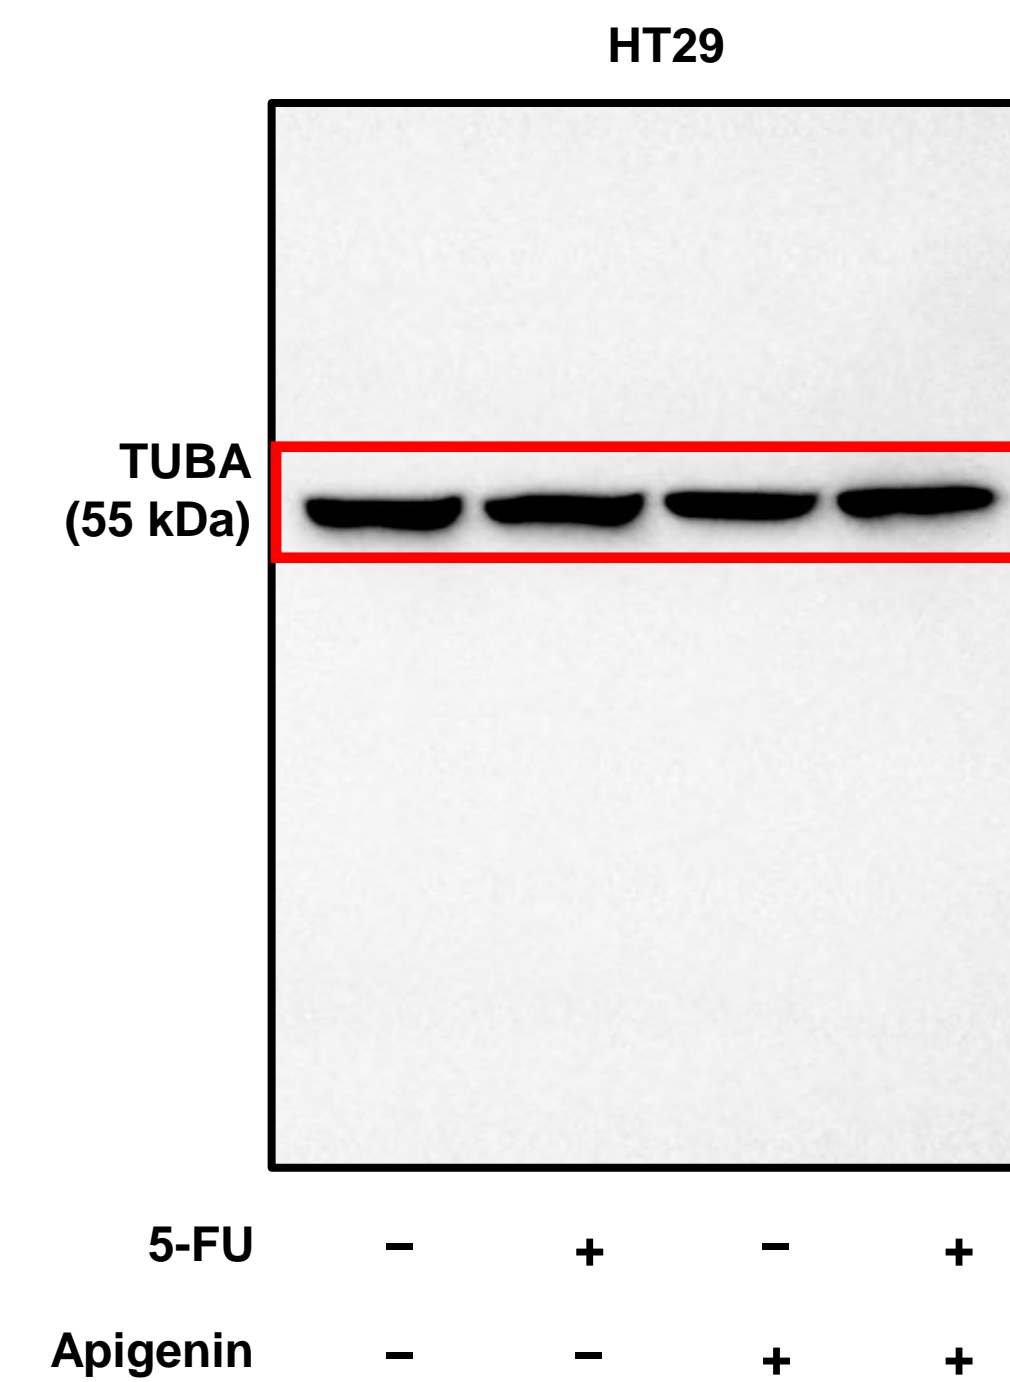

# Original blots for Figure 3

HCT116

CCND1  
(36 kDa)

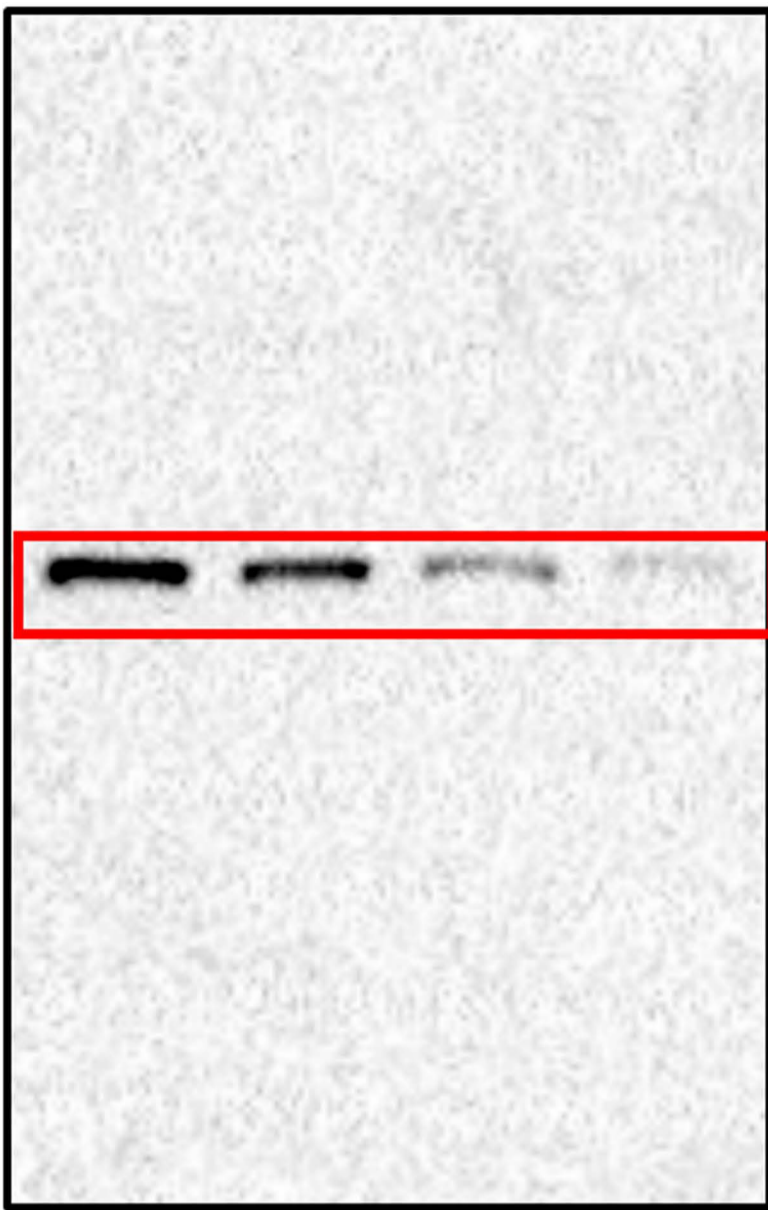

|          |   |   |   |   |
|----------|---|---|---|---|
| 5-FU     | - | + | - | + |
| Apigenin | - | - | + | + |

HT29

CCND1  
(36 kDa)

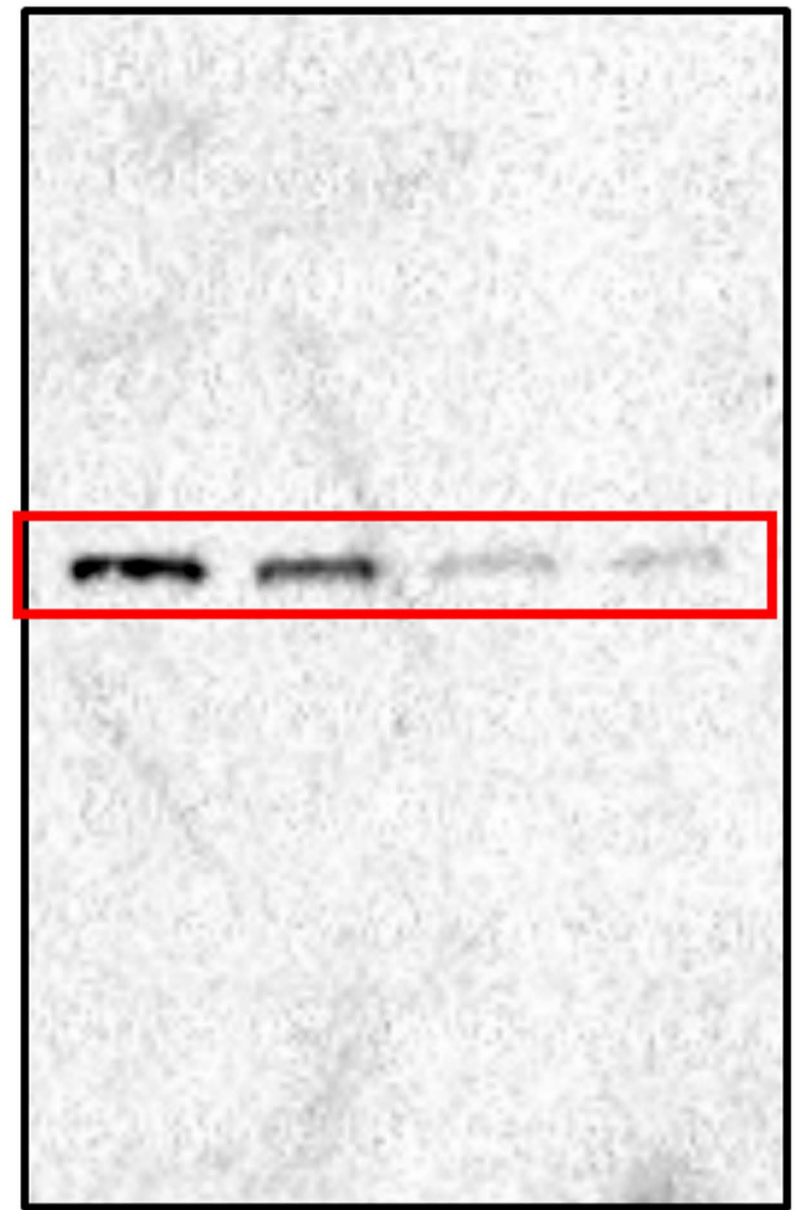

|          |   |   |   |   |
|----------|---|---|---|---|
| 5-FU     | - | + | - | + |
| Apigenin | - | - | + | + |

HCT116

TUBA  
(55 kDa)

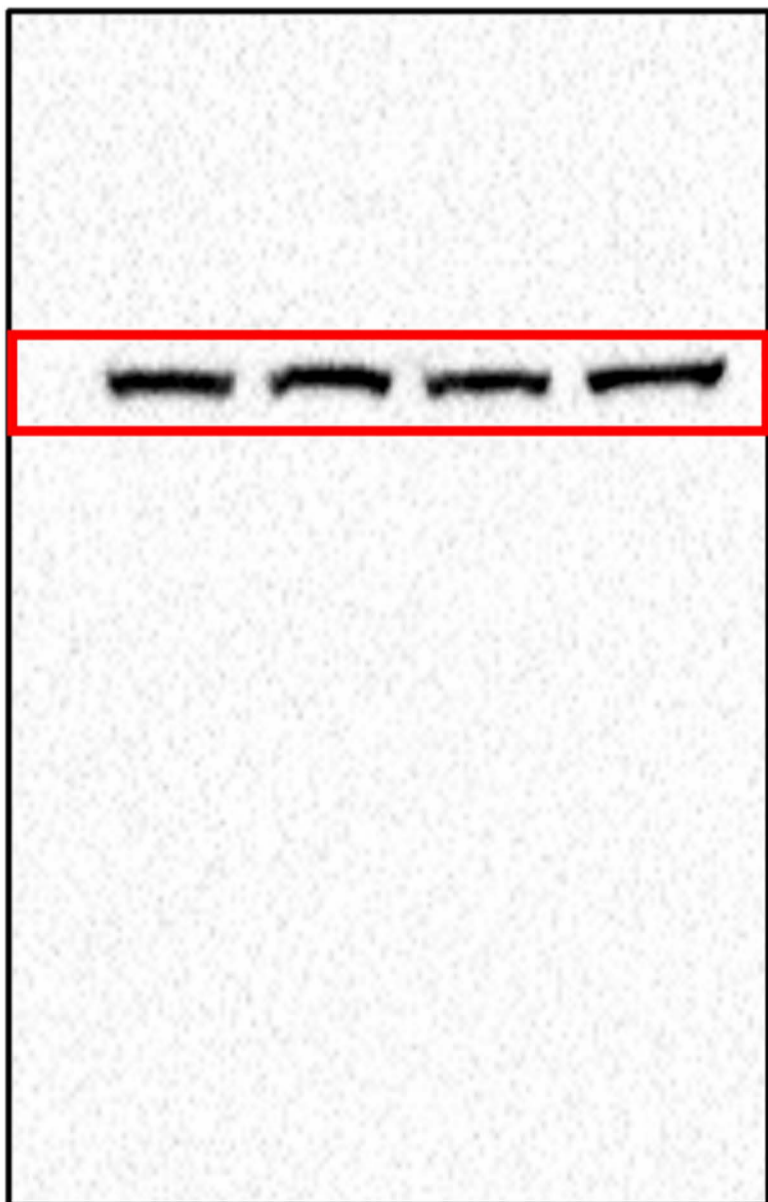

|          |   |   |   |   |
|----------|---|---|---|---|
| 5-FU     | - | + | - | + |
| Apigenin | - | - | + | + |

HT29

TUBA  
(55 kDa)

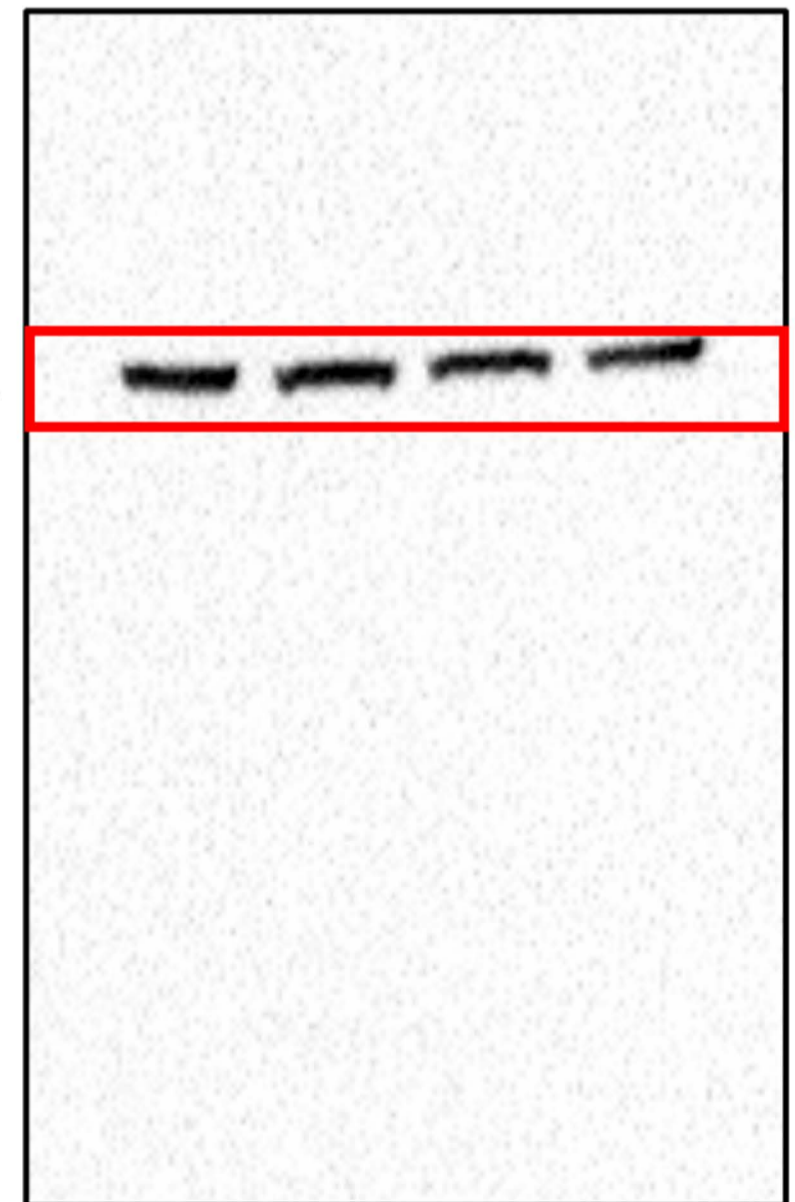

|          |   |   |   |   |
|----------|---|---|---|---|
| 5-FU     | - | + | - | + |
| Apigenin | - | - | + | + |

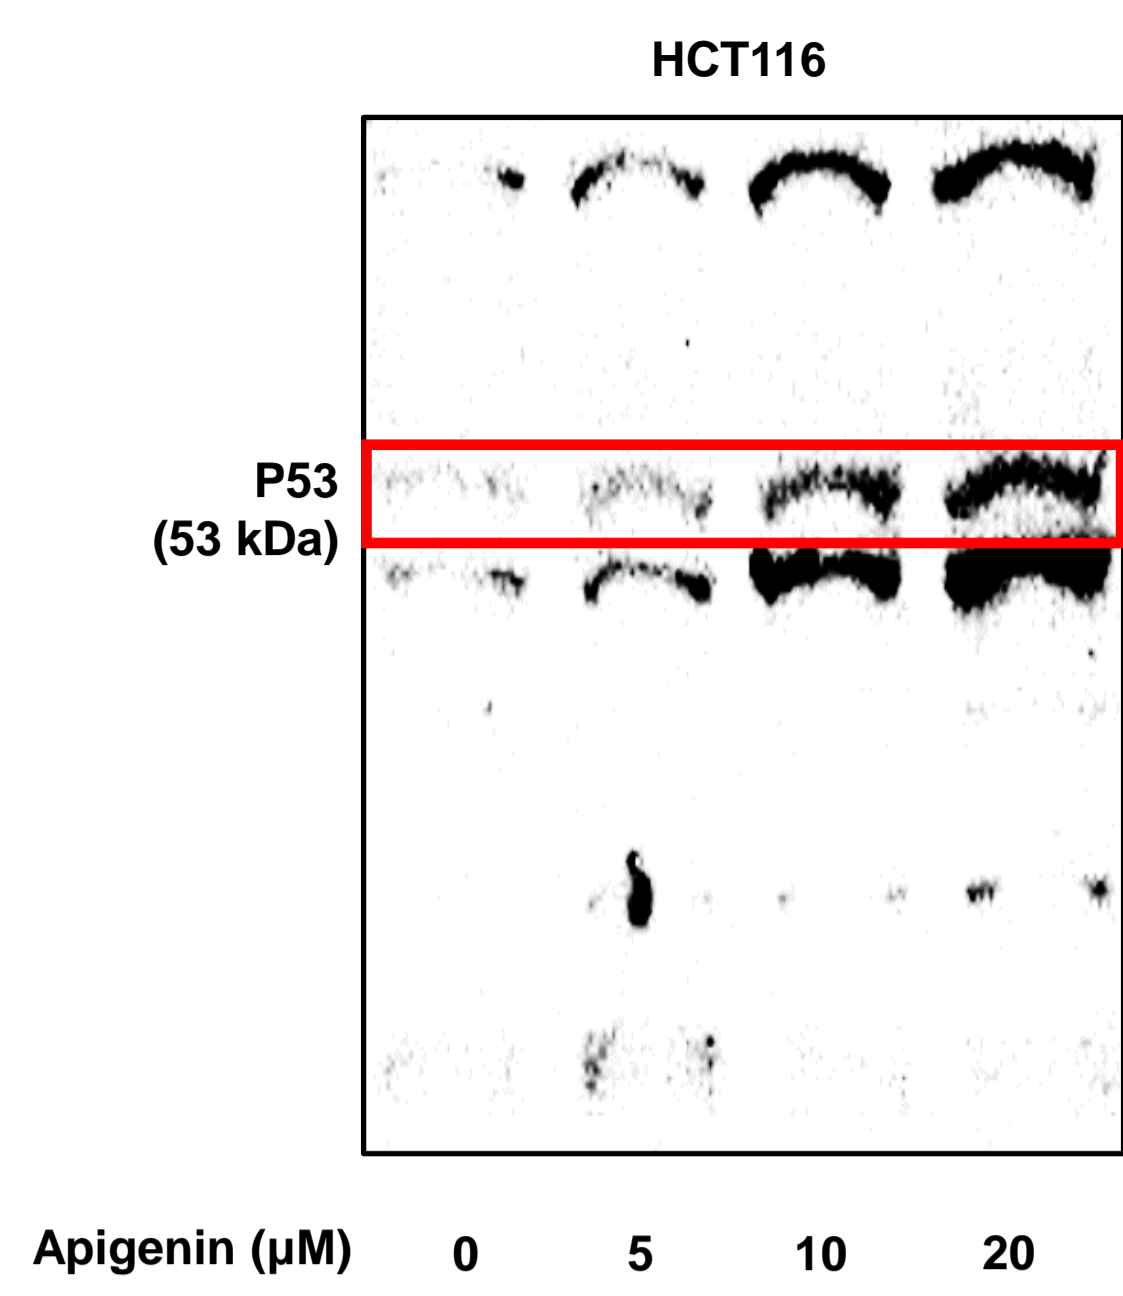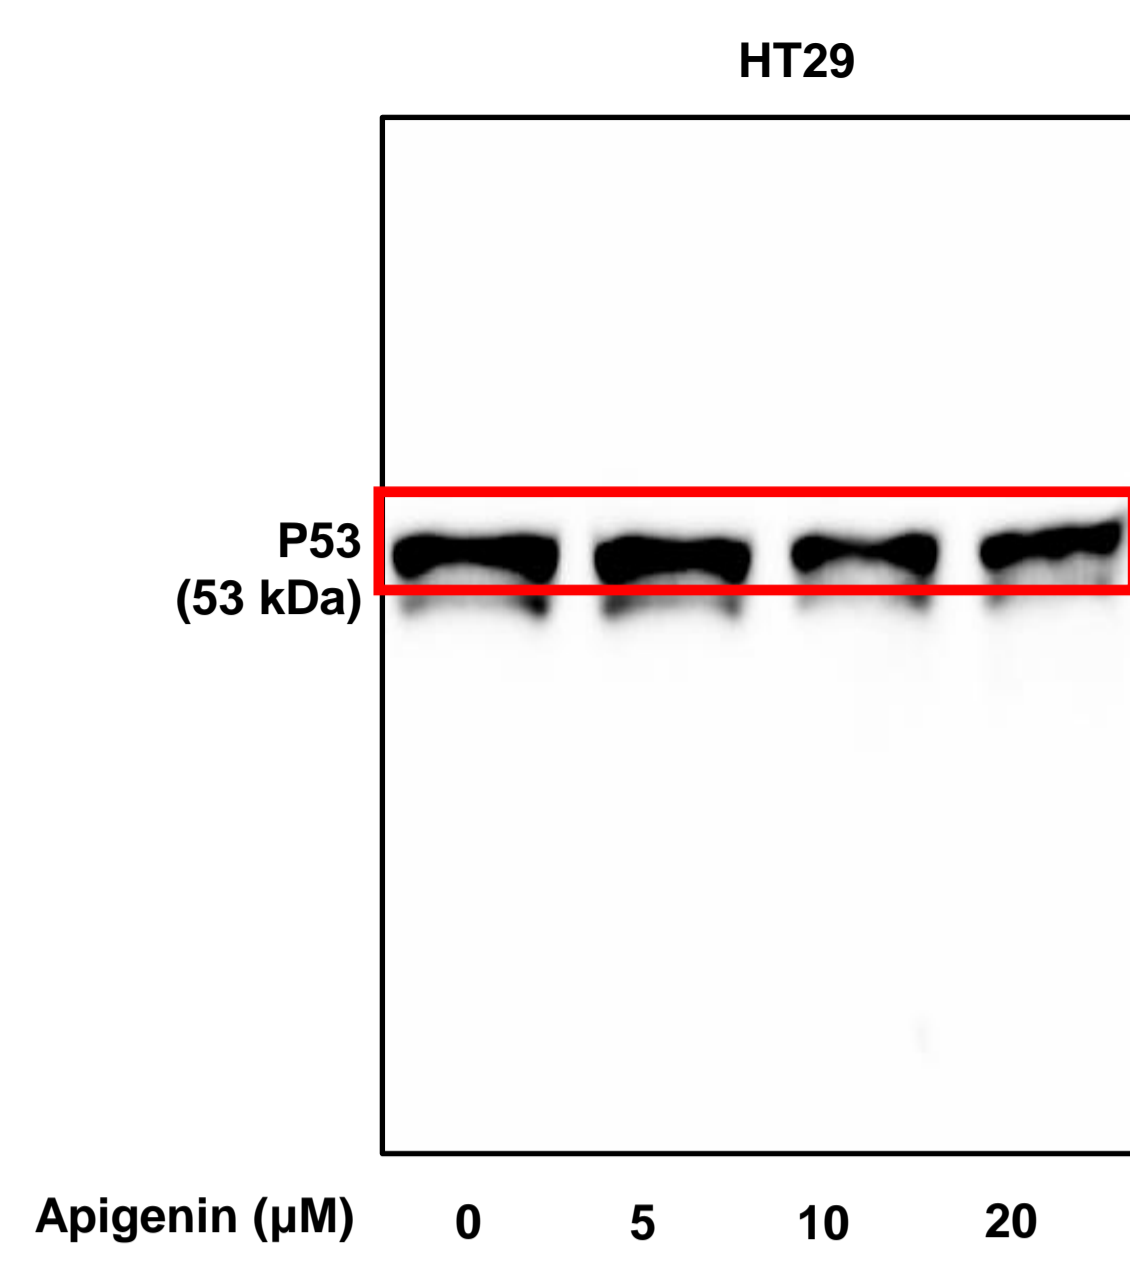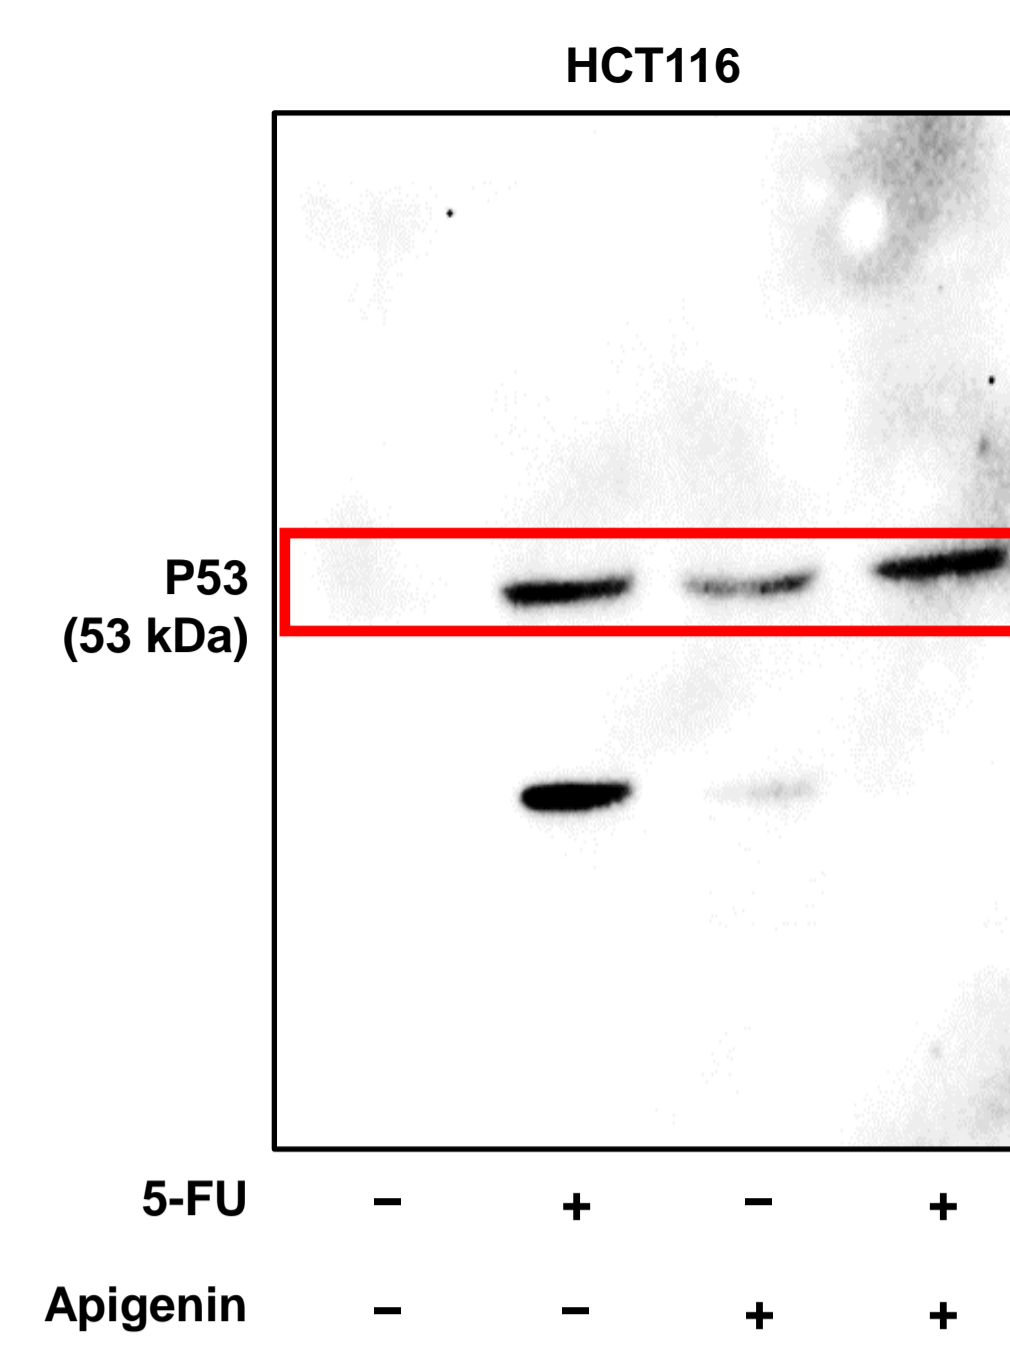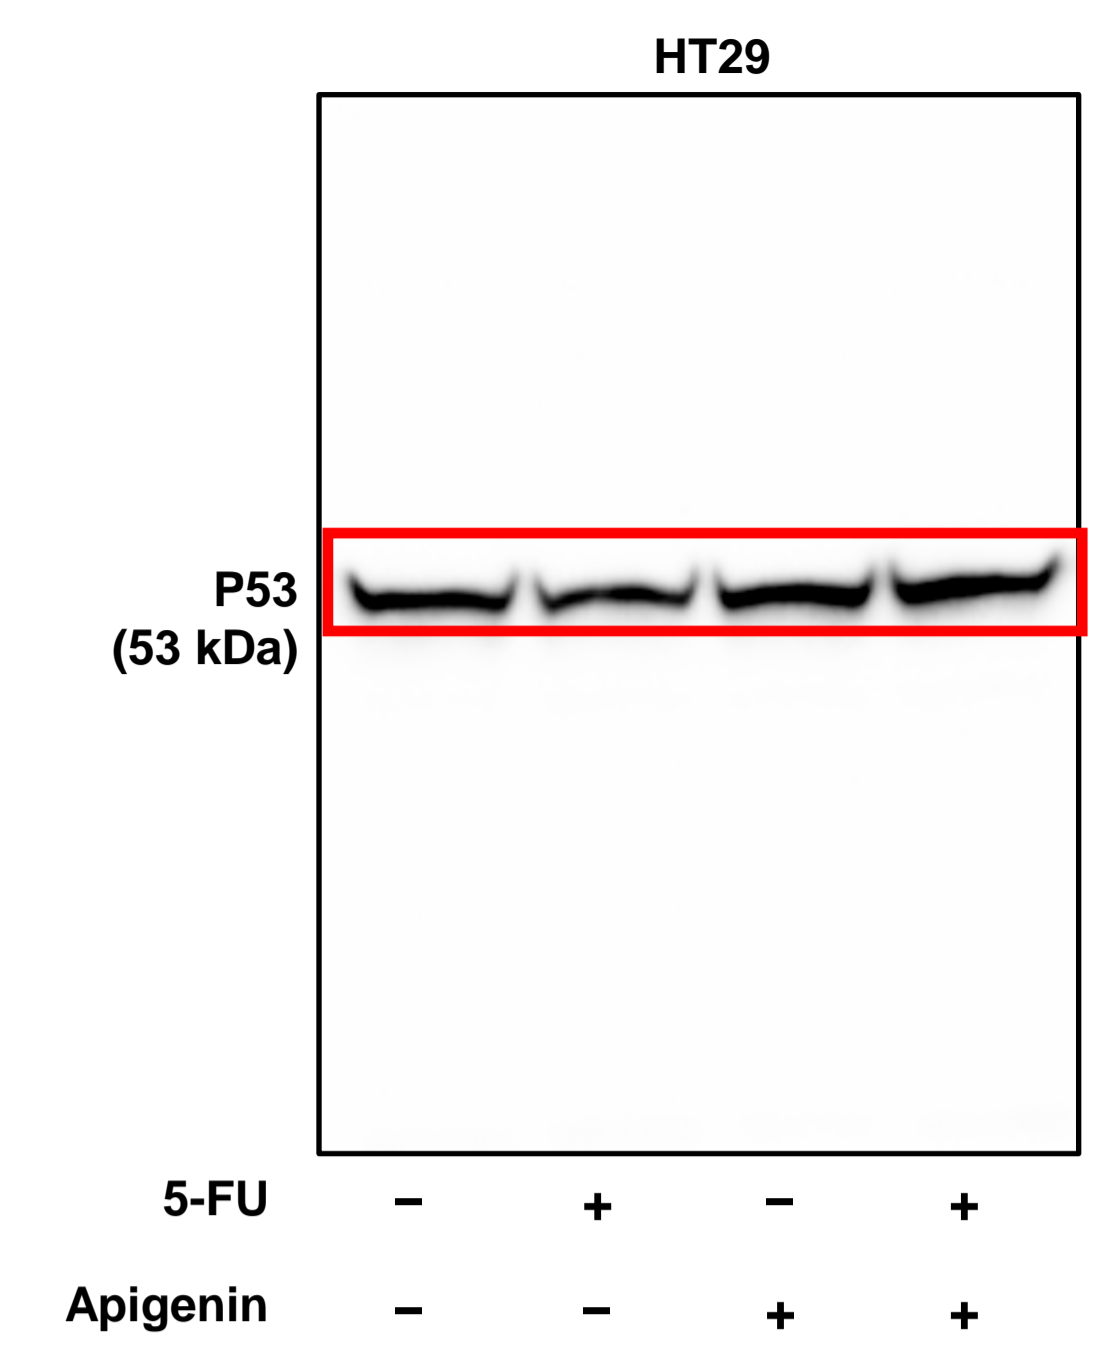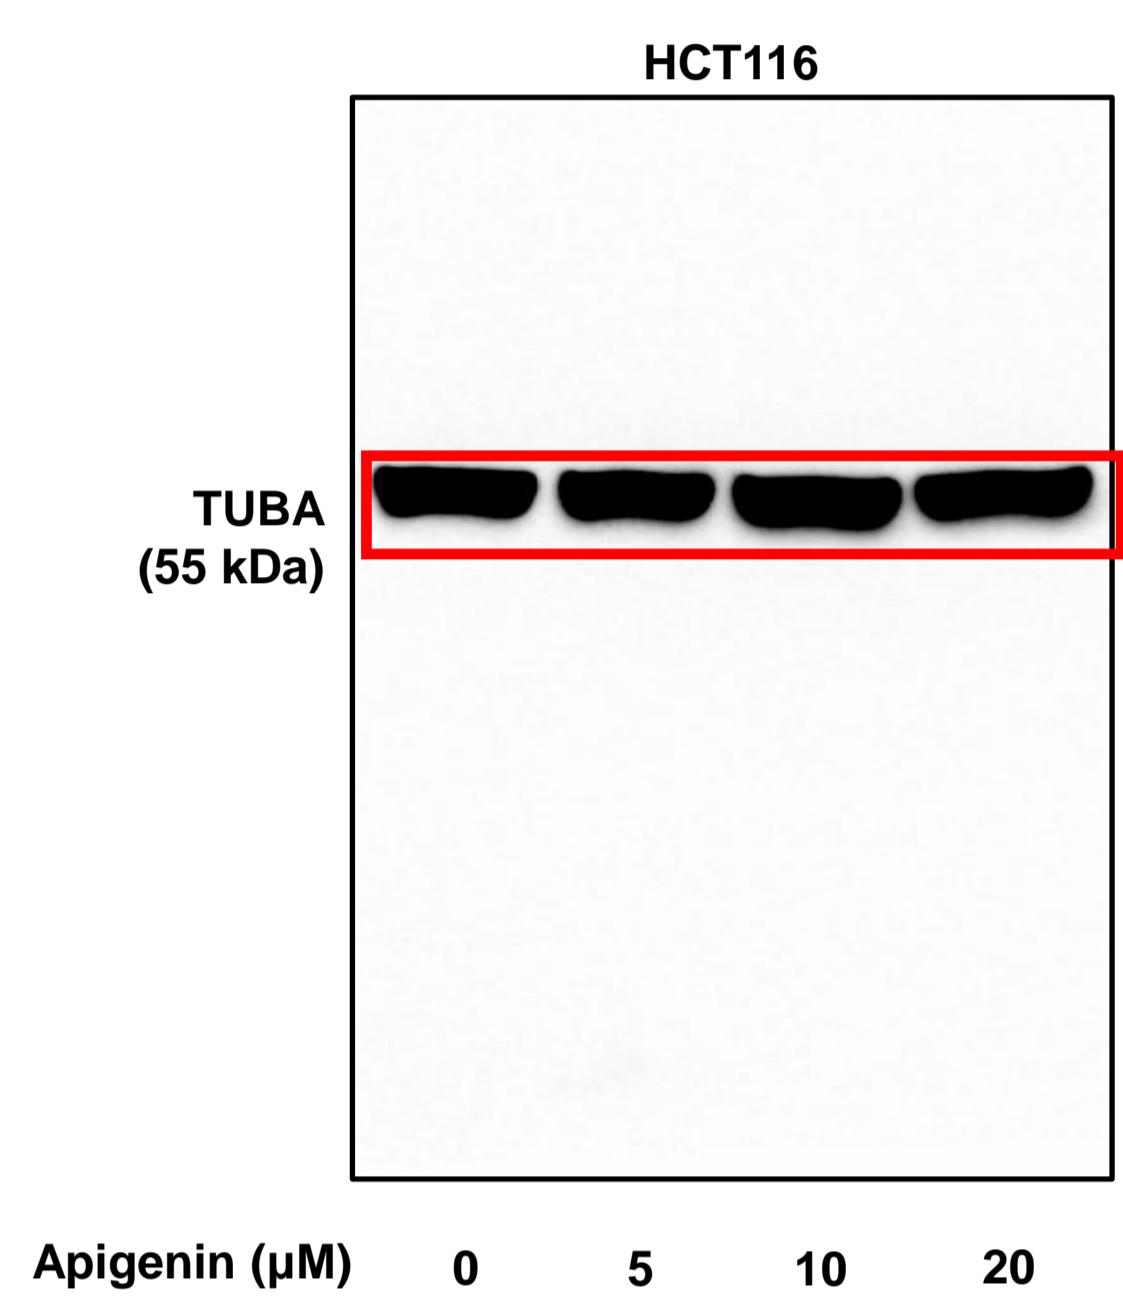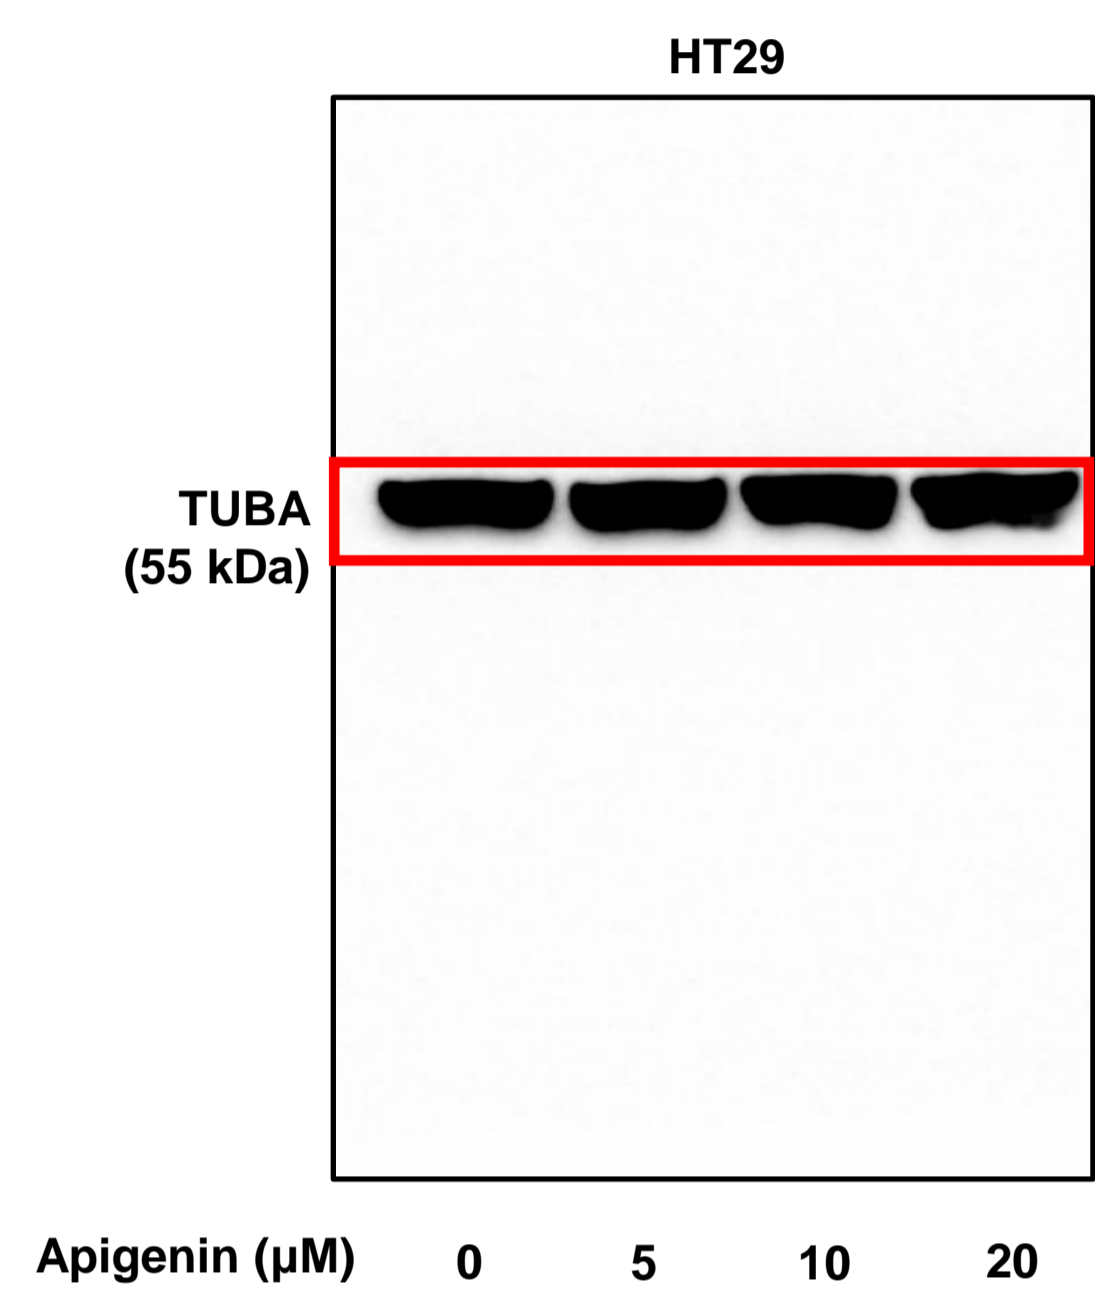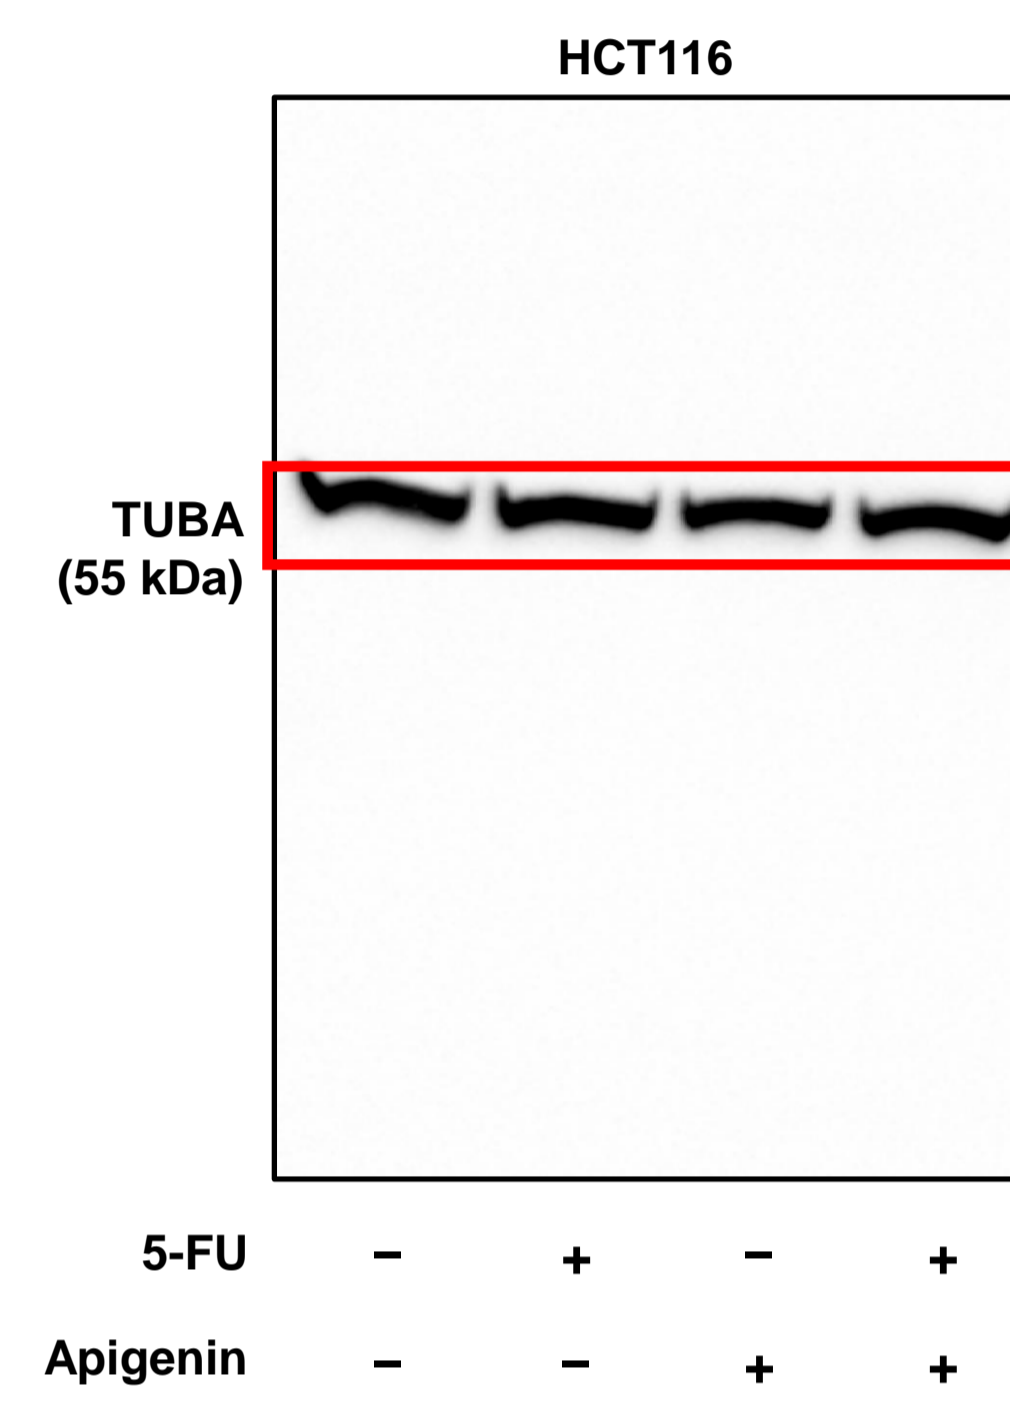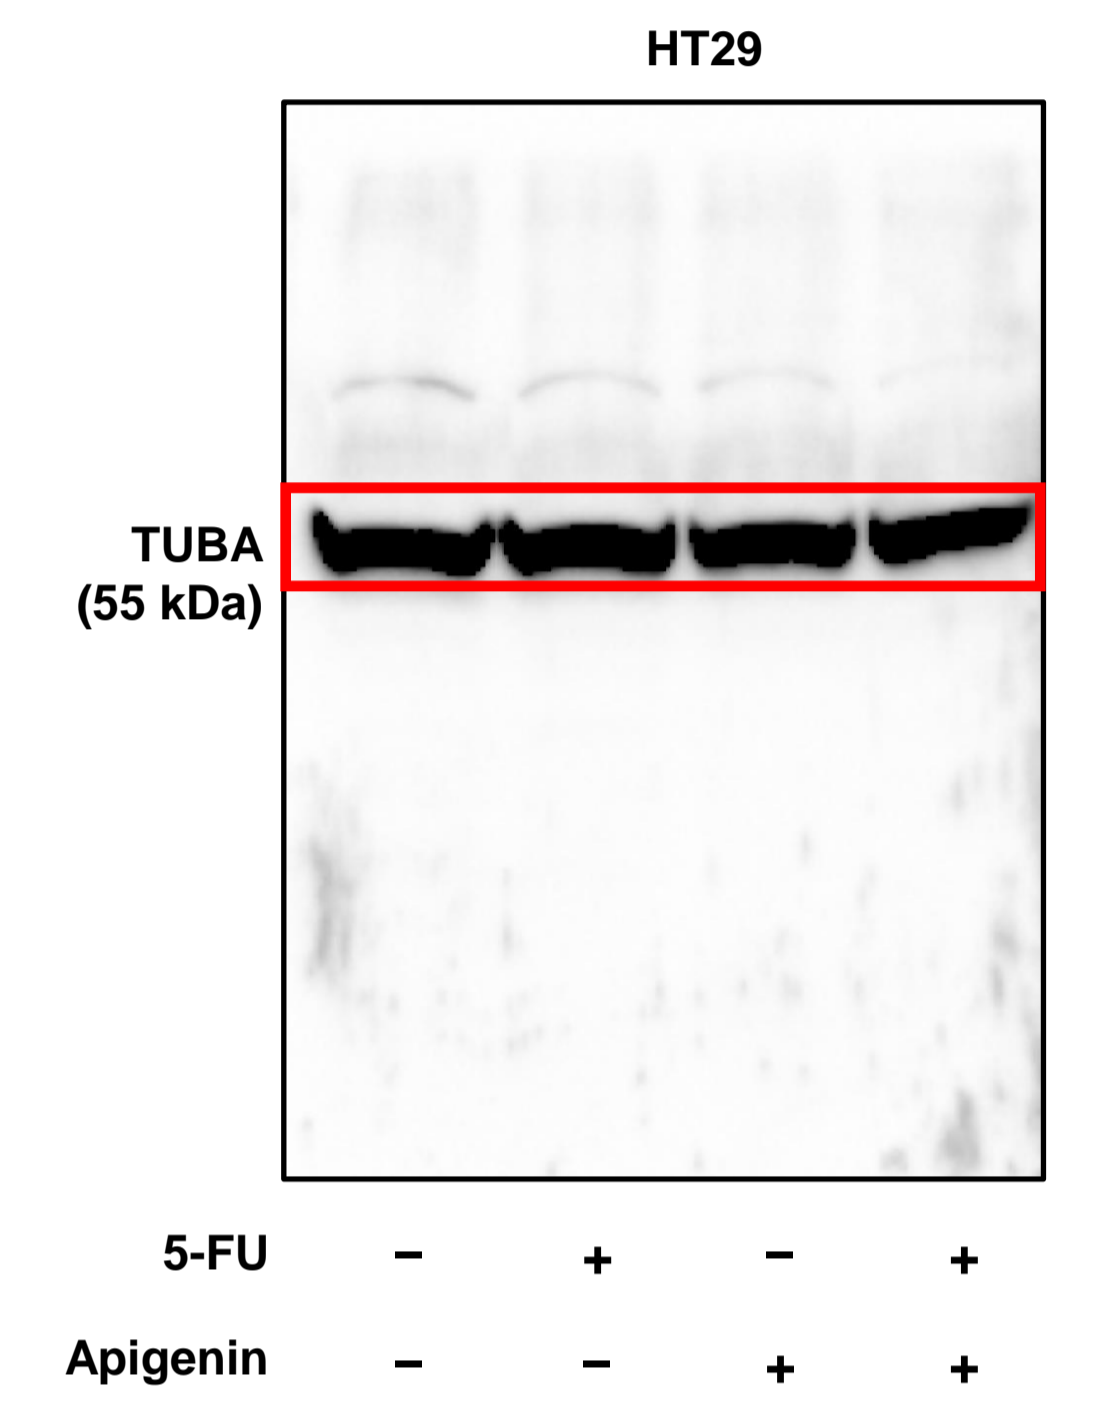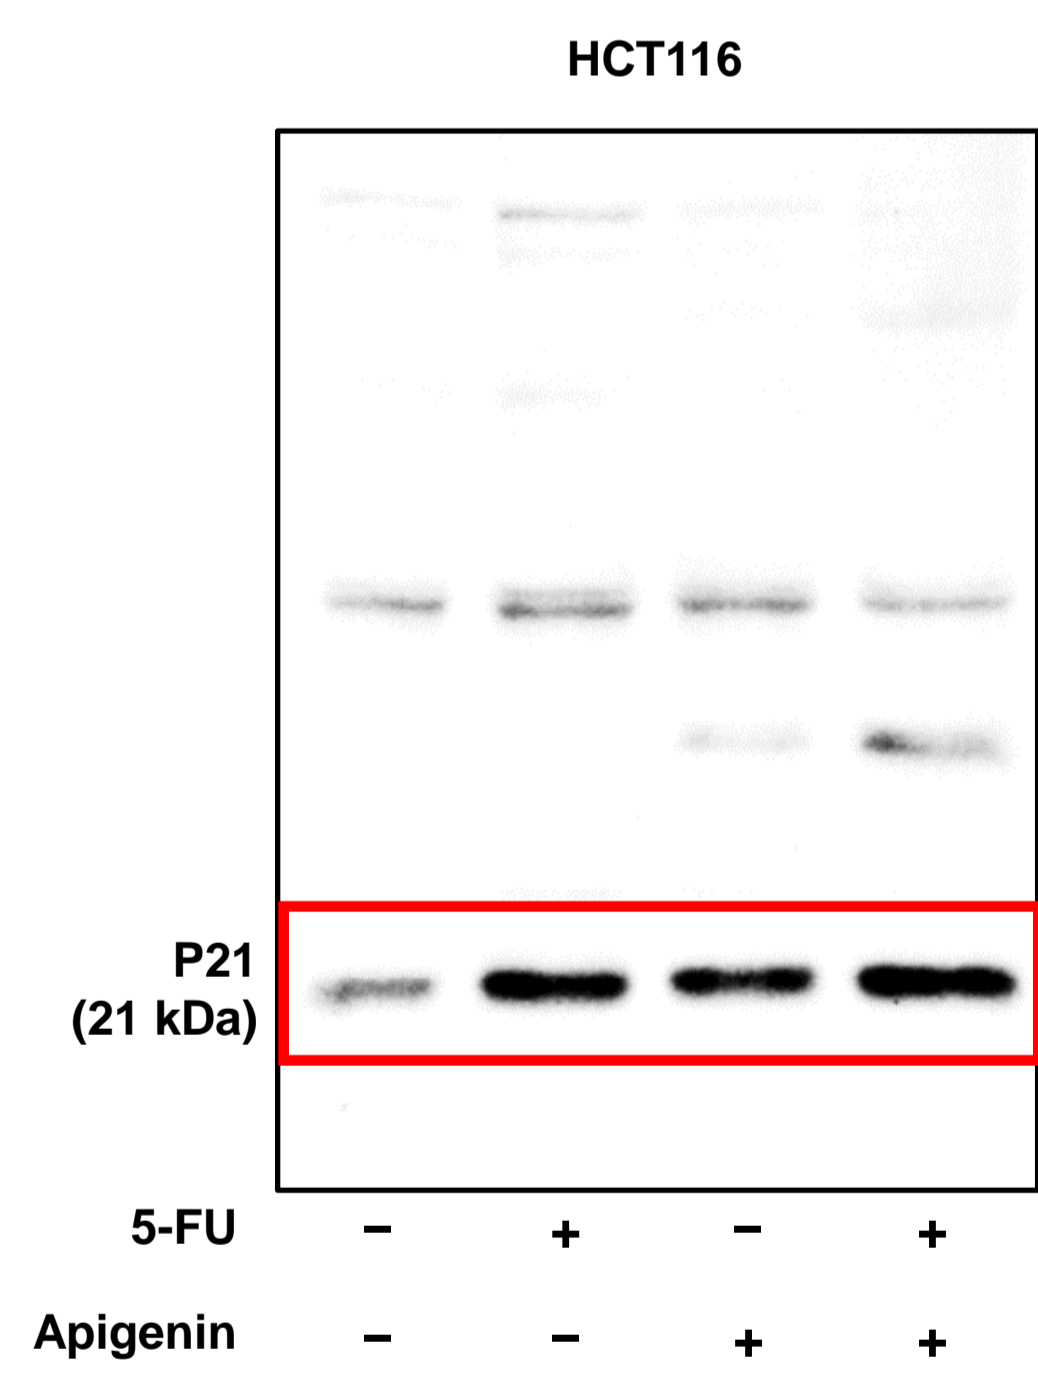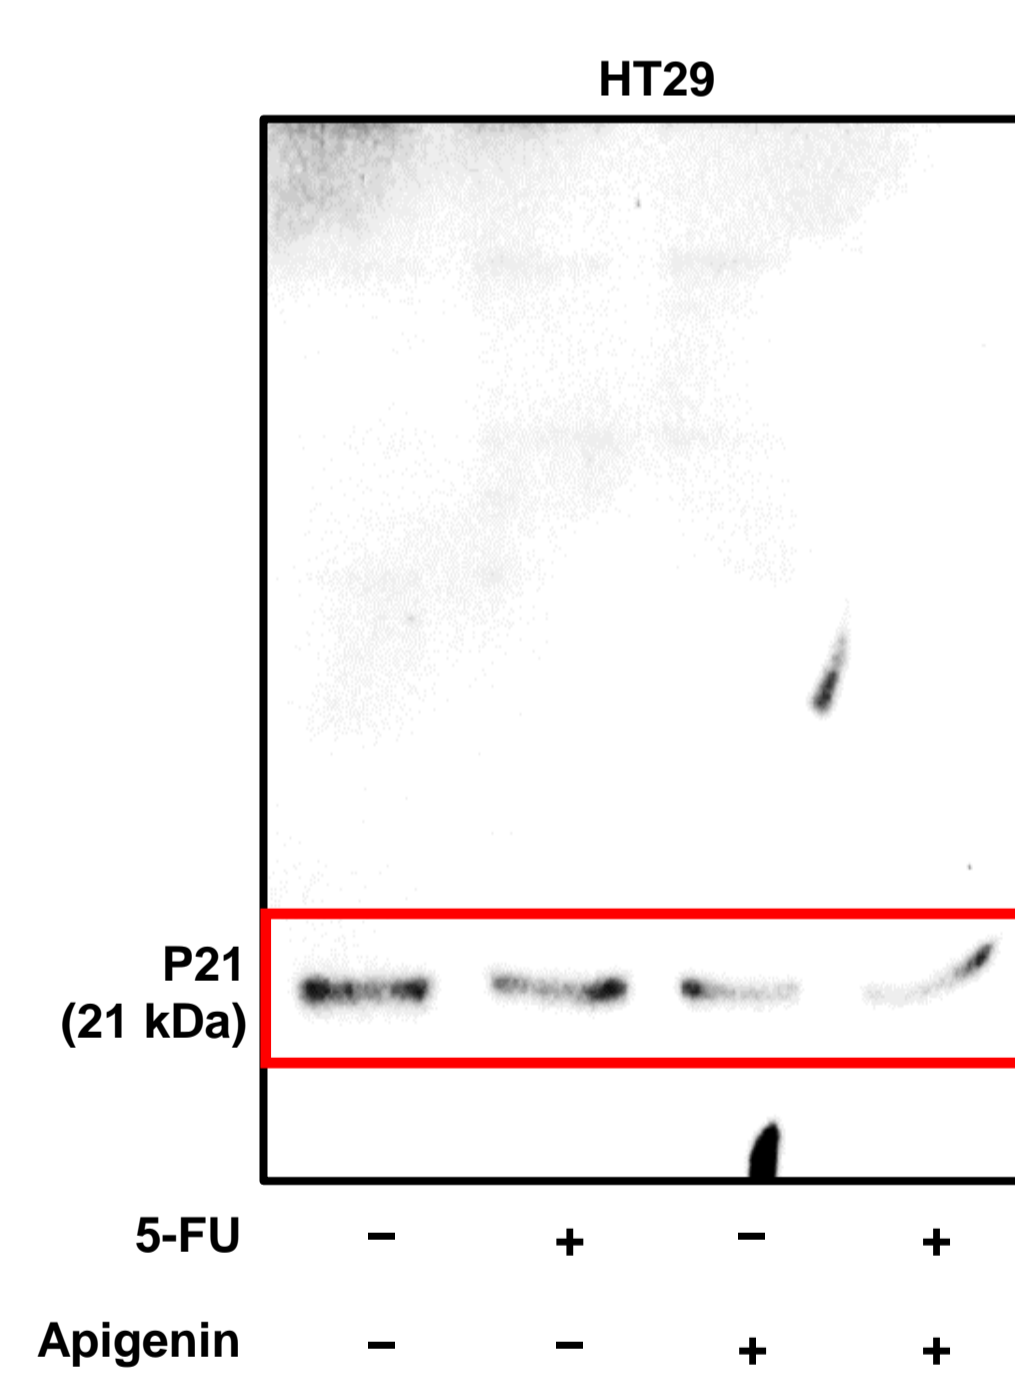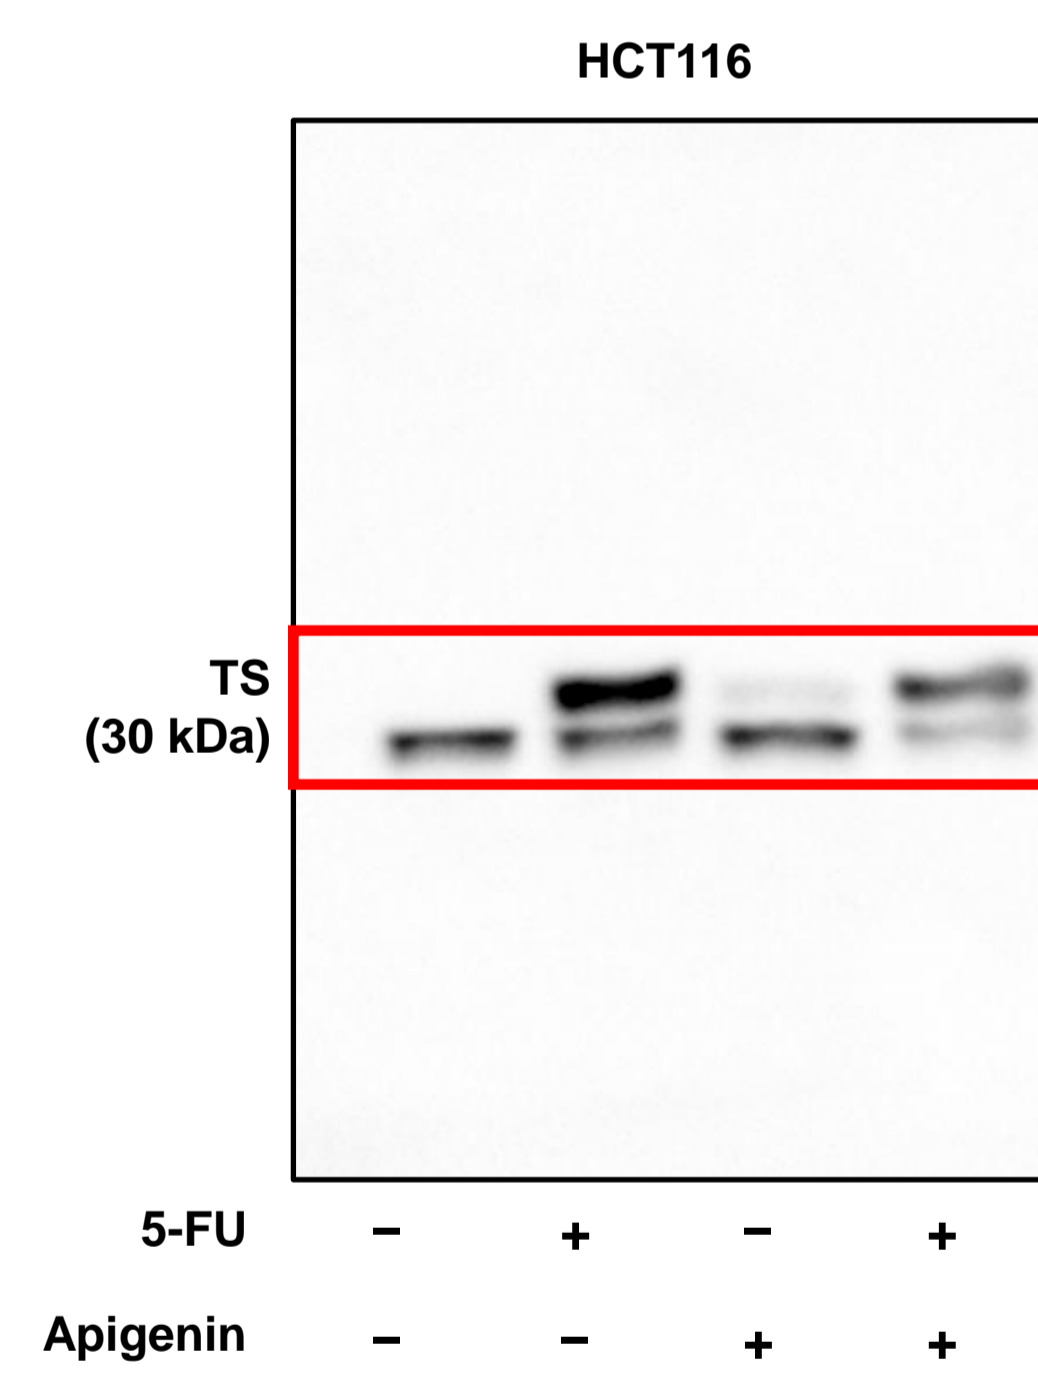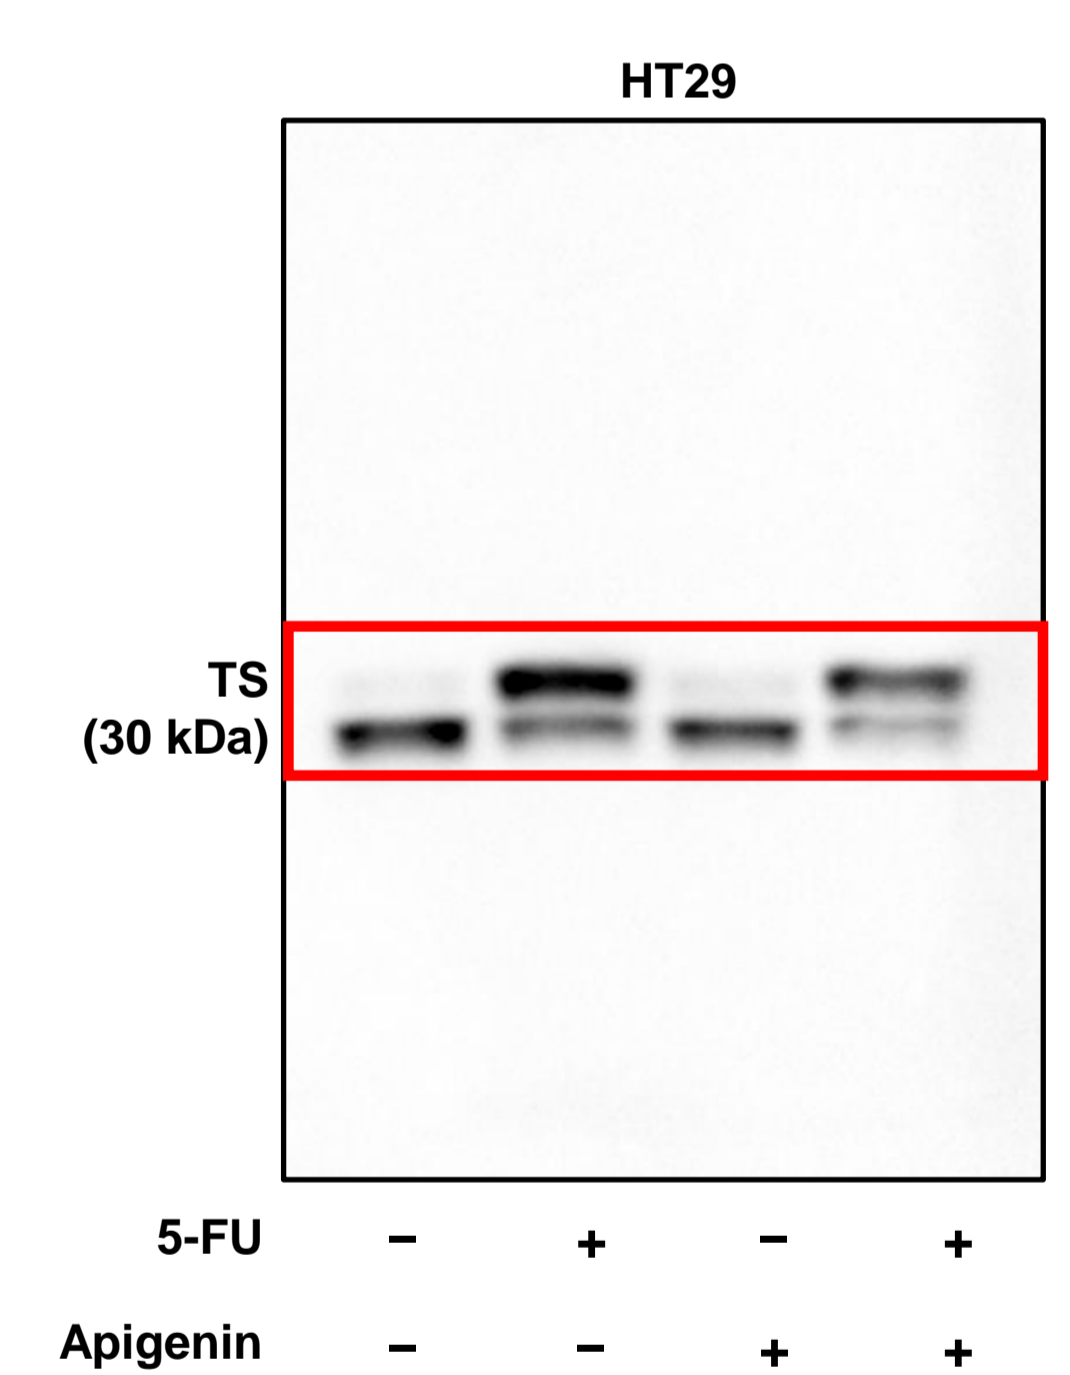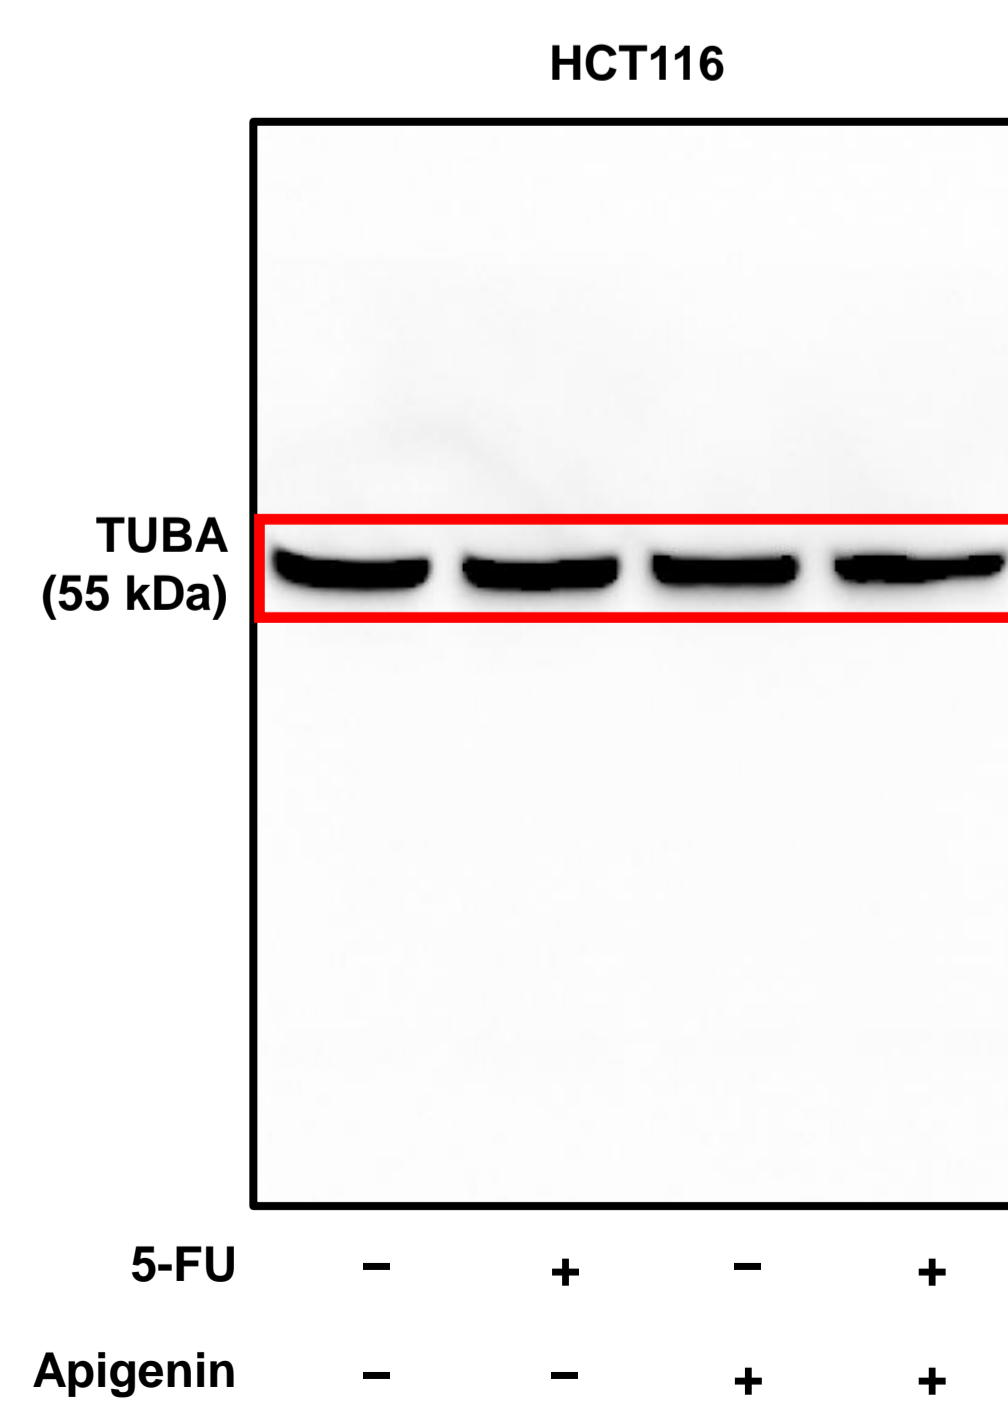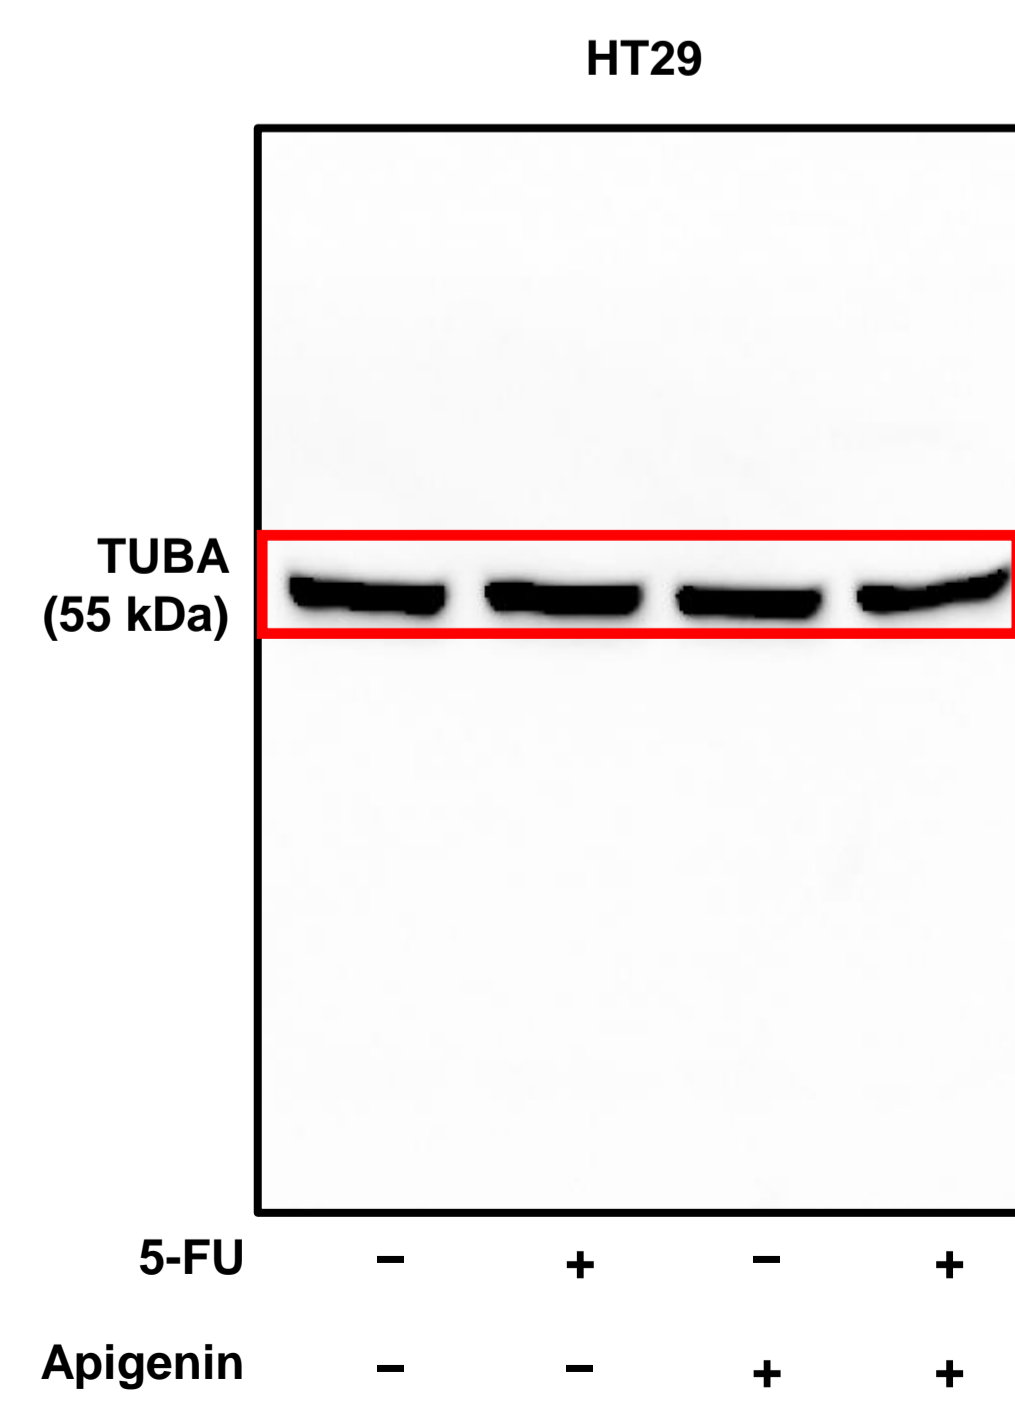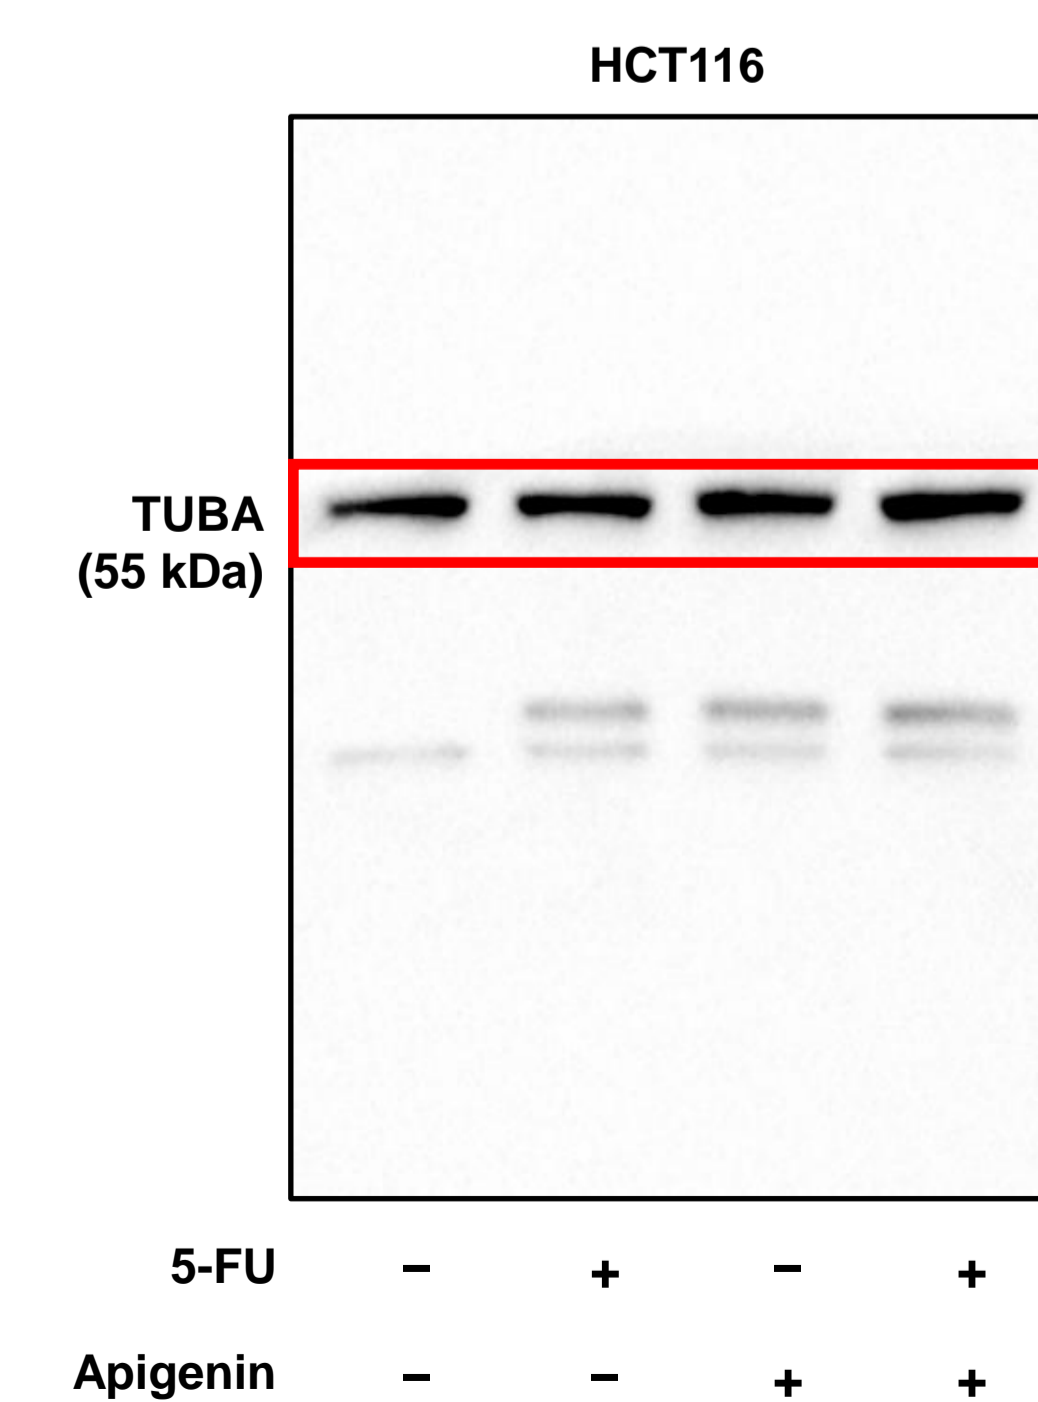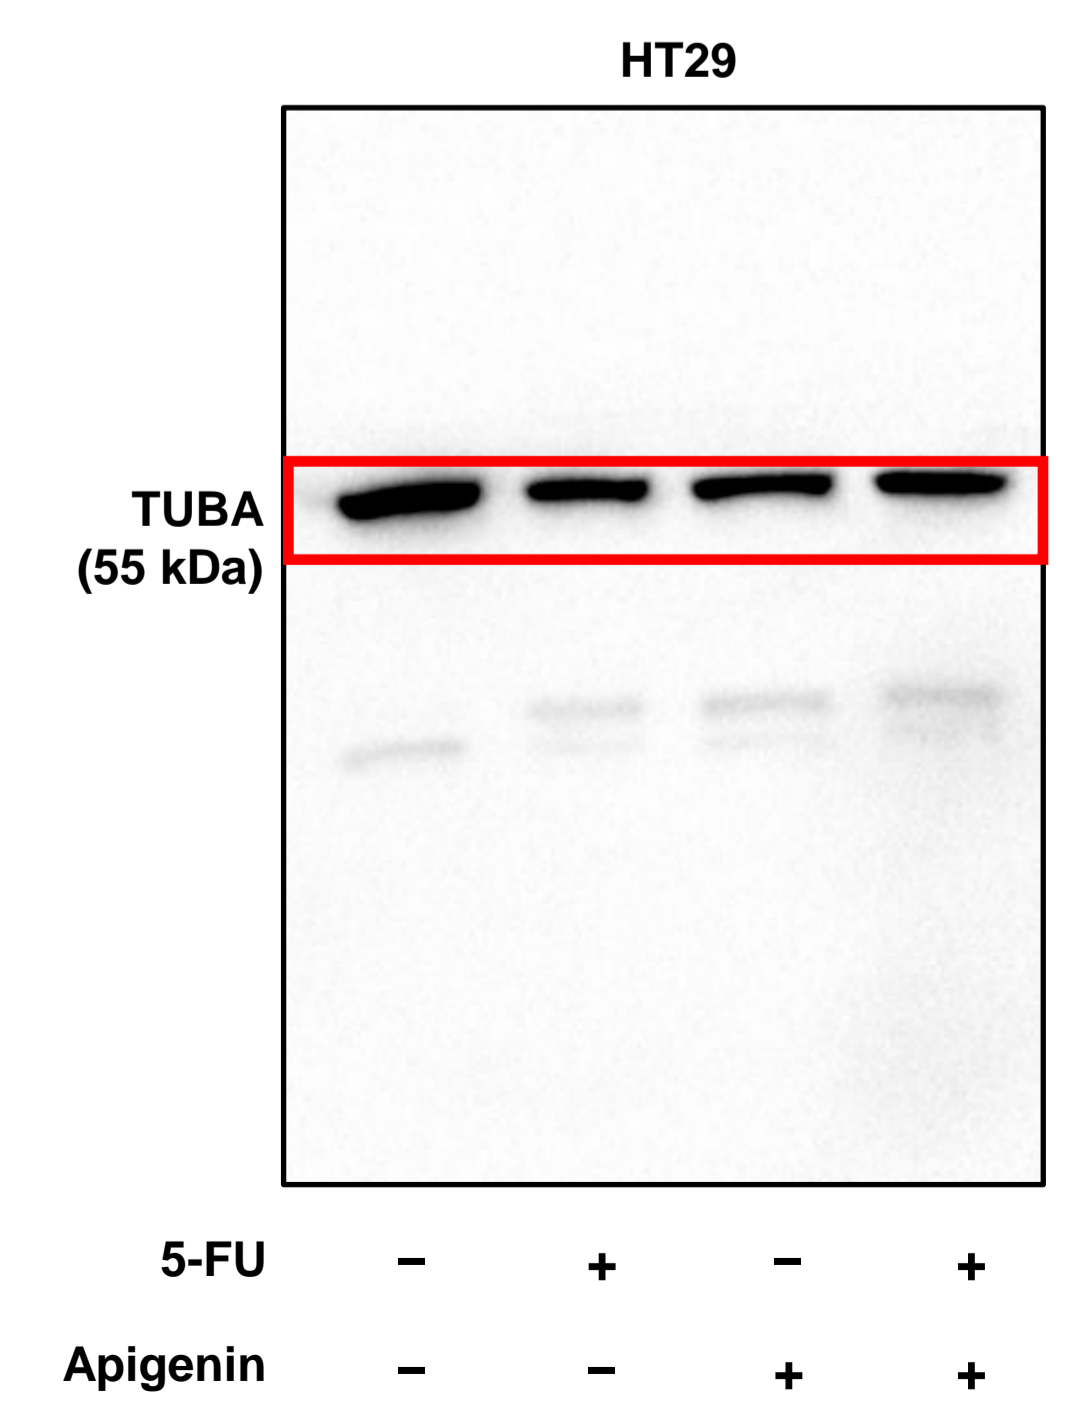

Original blots for Figure 7

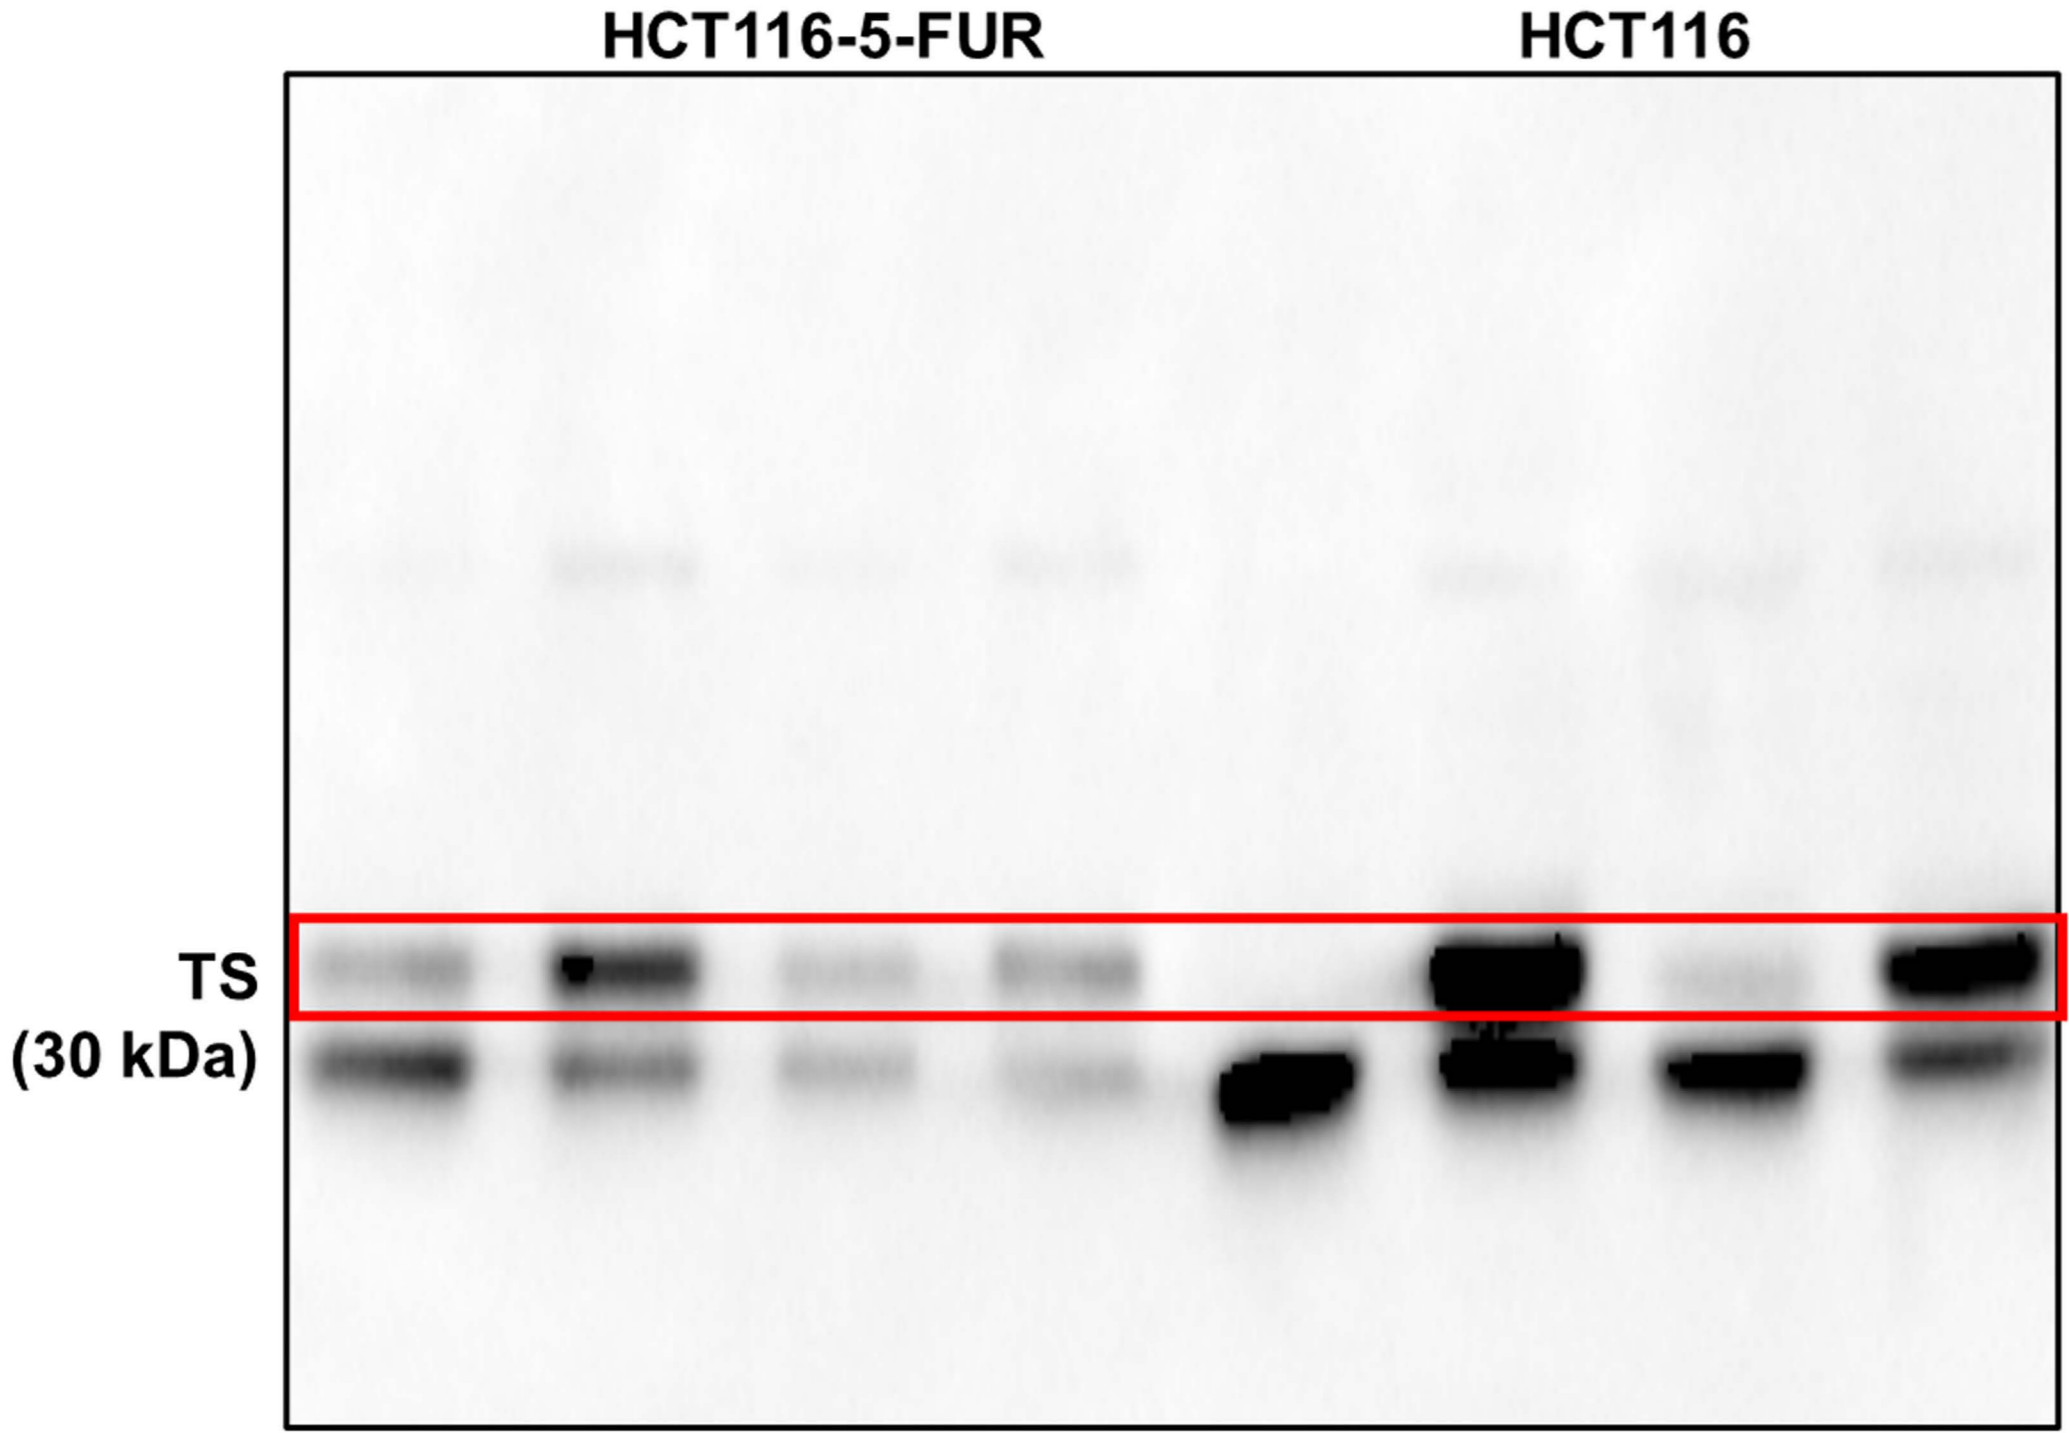

|          | HCT116-5-FUR |   |   |   | HCT116 |   |   |   |
|----------|--------------|---|---|---|--------|---|---|---|
| 5-FU     | -            | + | - | + | -      | + | - | + |
| Apigenin | -            | - | + | + | -      | - | + | + |

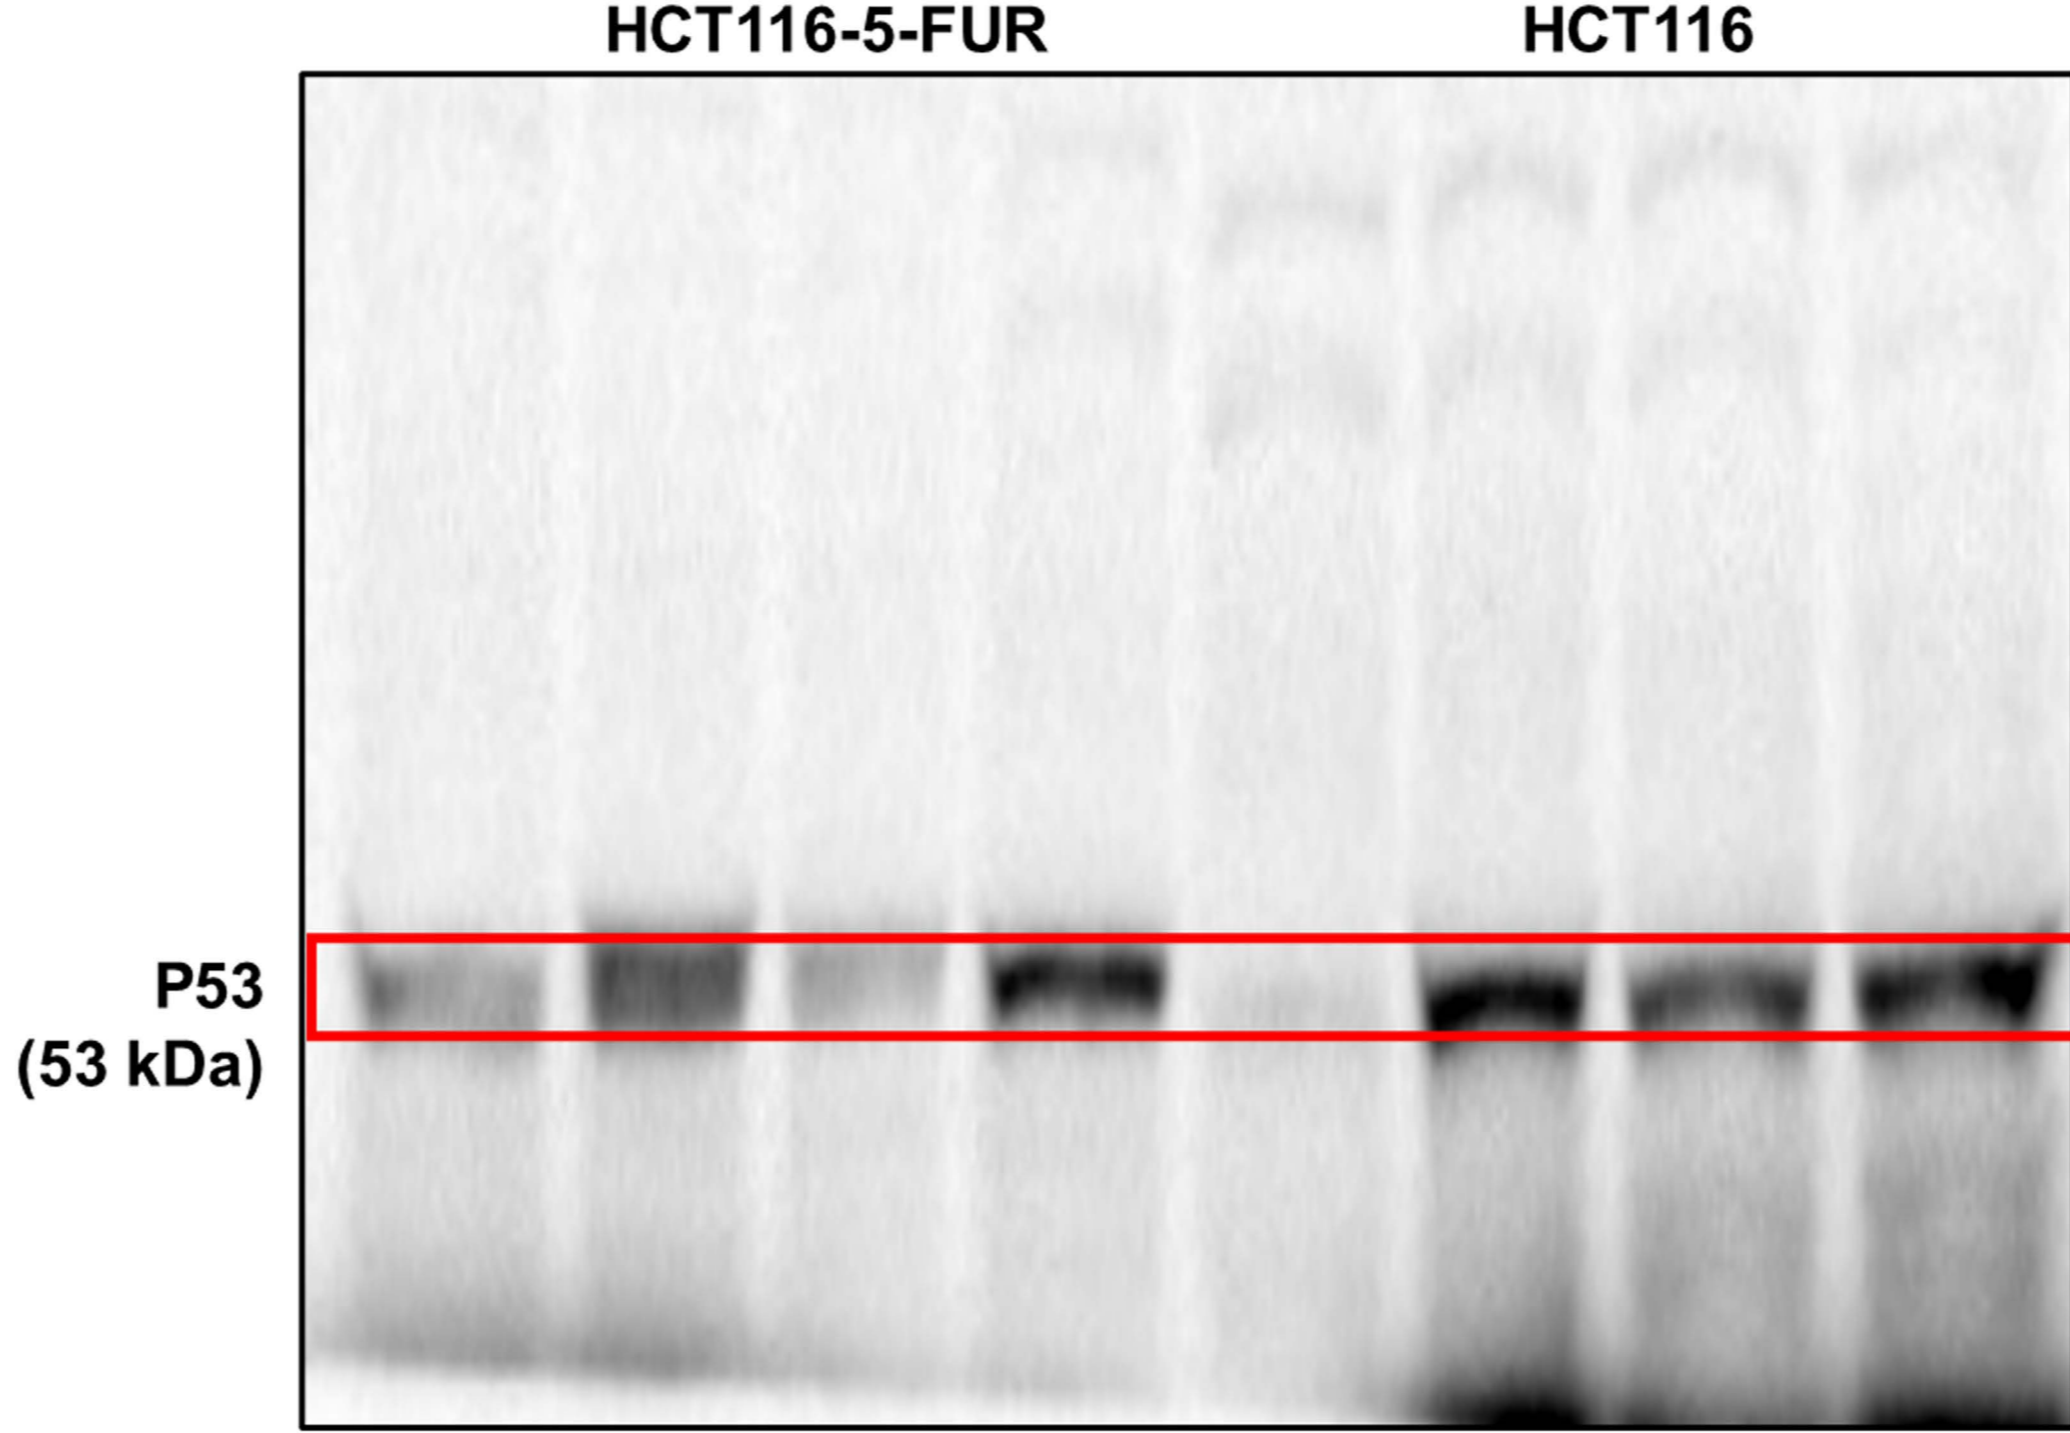

|          | HCT116-5-FUR |   |   |   | HCT116 |   |   |   |
|----------|--------------|---|---|---|--------|---|---|---|
| 5-FU     | -            | + | - | + | -      | + | - | + |
| Apigenin | -            | - | + | + | -      | - | + | + |

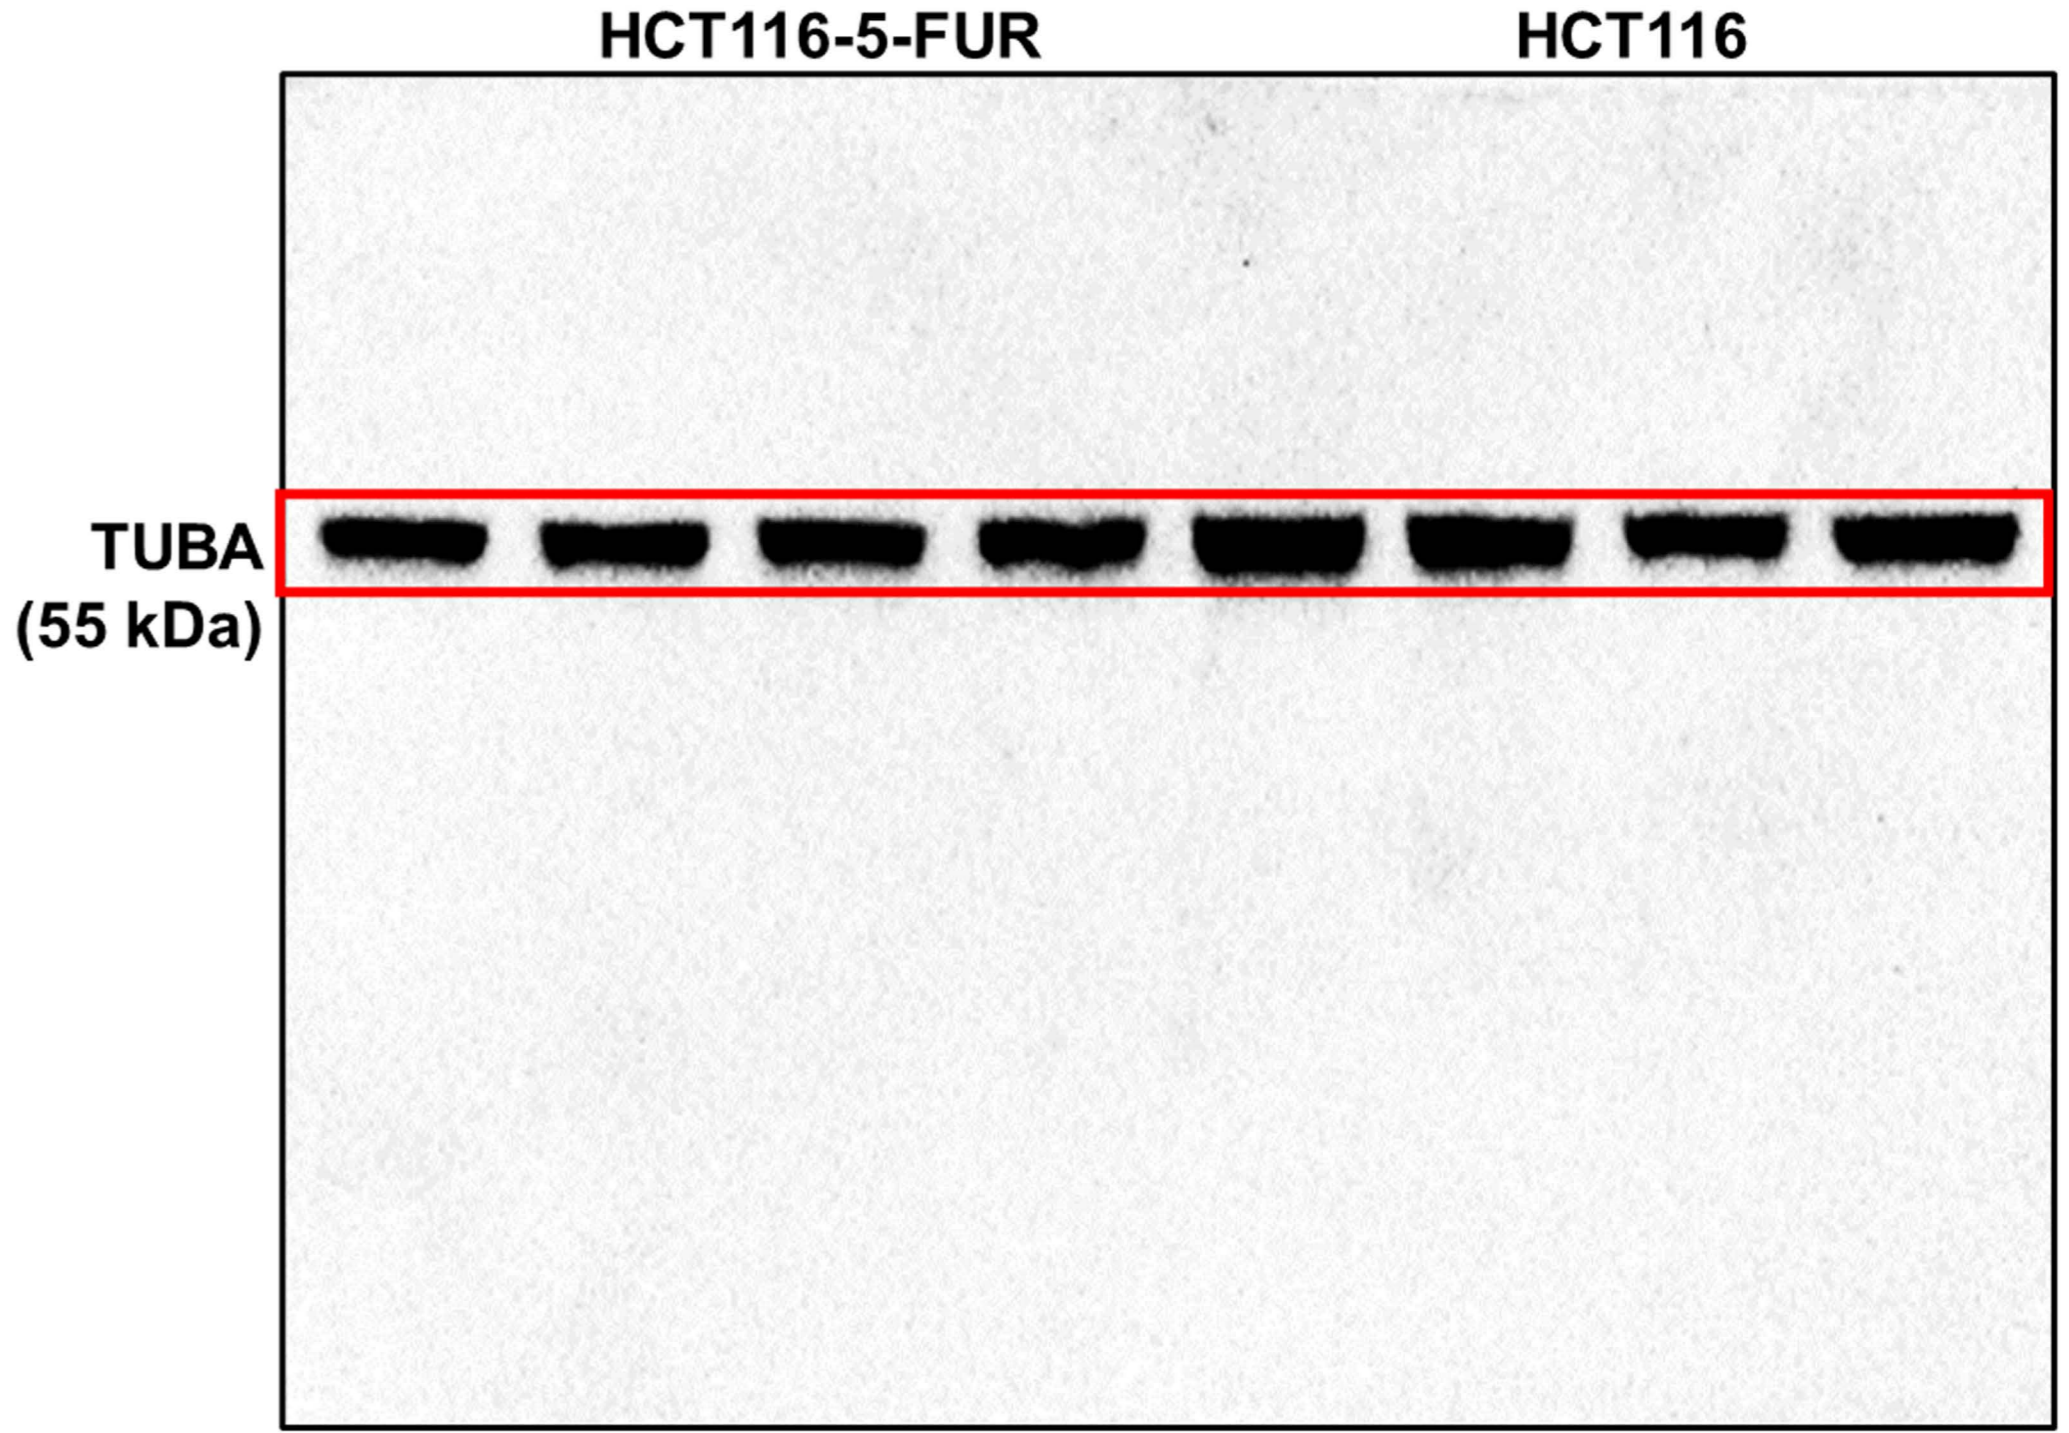

|          | HCT116-5-FUR |   |   |   | HCT116 |   |   |   |
|----------|--------------|---|---|---|--------|---|---|---|
| 5-FU     | -            | + | - | + | -      | + | - | + |
| Apigenin | -            | - | + | + | -      | - | + | + |
